1 **Polyunsaturated fatty acid analogues differentially affect cardiac Na<sub>v</sub>, Ca<sub>v</sub>, and K<sub>v</sub>**  
2 **channels through unique mechanisms**

3 Briana M. Bohannon<sup>1</sup>, Xiaoan Wu<sup>1</sup>, Marta E. Perez<sup>1</sup>, Sara I. Liin<sup>2</sup> and H. Peter Larsson<sup>1</sup>

4 <sup>1</sup>Department of Physiology and Biophysics, Miller School of Medicine, University of  
5 Miami, Miami, FL 33136, USA.

6 <sup>2</sup>Department of Clinical and Experimental Medicine, Linköping University. SE-581 85  
7 Linköping, Sweden.

8 Corresponding authors:

9 H. Peter Larsson

10 Department of Physiology and Biophysics,  
11 Miller School of Medicine,  
12 University of Miami,  
13 1600 NW 10<sup>th</sup> Avenue,  
14 Miami, FL 33136, USA.

15  
16 [plarsson@med.miami.edu](mailto:plarsson@med.miami.edu), ph: 305-243-1021

17  
18 Key words: I<sub>Ks</sub>, Cav1.2, Nav1.5, Long QT Syndrome, polyunsaturated fatty acids

19

20 **Abstract**

21 The cardiac ventricular action potential depends on several voltage-gated ion channels,  
22 including  $N_{aV}$ ,  $Ca_v$ , and  $K_v$  channels. Mutations in these channels can cause Long QT  
23 Syndrome (LQTS) which increases the risk for ventricular fibrillation and sudden cardiac  
24 death. Polyunsaturated fatty acids (PUFAs) have emerged as potential therapeutics for  
25 LQTS because they are modulators of voltage-gated ion channels. Here we  
26 demonstrate that PUFA analogues vary in their selectivity for human voltage-gated ion  
27 channels involved in the ventricular action potential. The effects of specific PUFA  
28 analogues range from selective for a specific ion channel to broadly modulating all three  
29 cardiac ion channels ( $N_{aV}$ ,  $C_{aL}$ , and  $I_{Ks}$ ). In addition, PUFA analogues do not modulate  
30 these channels through a shared mechanism. Our data suggest that different PUFA  
31 analogues could be tailored towards specific forms of LQTS, which are caused by  
32 mutations in distinct cardiac ion channels, and thus restore a normal ventricular action  
33 potential.

34

## 35 **Introduction**

36 The ventricular action potential is mediated by the coordinated activity of several  
37 different voltage-dependent ion channels (1). The rapid upstroke of the ventricular  
38 action potential is mediated by the activation of the voltage-gated Na<sup>+</sup> channel, Nav1.5,  
39 which then rapidly inactivates. The activation of L-type voltage gated Ca<sup>2+</sup> channels,  
40 Cav1.2, and influx of Ca<sup>2+</sup> leads to a sustained depolarization, or plateau phase, and the  
41 contraction of the cardiac muscle. Inactivation of Cav1.2 channels along with the  
42 activation of the slow delayed-rectifier K<sup>+</sup> channels, Kv11.1 (which generates the I<sub>Kr</sub>  
43 current) and Kv7.1/KCNE1 (which generates the I<sub>Ks</sub> current), work to promote  
44 repolarization of the cell membrane (2). Mutations of any of these ion channels (or  
45 channelopathies) could lead to Long QT Syndrome (LQTS), which is an arrhythmogenic  
46 disorder that predisposes the individual to potentially fatal cardiac arrhythmias (3, 4).

47  
48 The Nav1.5 α-subunit contains four non-identical linked domains, DI-DIV. Each of these  
49 domains contain 6 transmembrane segments (S1-S6), where the S1-S4 segments  
50 make up the voltage-sensing domains (VSD) and S5-S6 segments make up the pore  
51 domains (PD). The S4 helix of each of the four domains contains a motif with positively  
52 charged amino acid residues which allow the S4 segment to detect and respond to  
53 changes in the membrane electric field, acting as the channel voltage sensor (5). The  
54 movement of these voltage sensors determines the voltage dependence of activation  
55 and inactivation, where activation of the DI-III S4s are suggested to promote activation  
56 and activation of DIV S4 segment is sufficient to induce voltage-dependent inactivation  
57 of Nav1.5 (6). The Nav1.5 α-subunit exists as a macromolecular complex with the  
58 accessory subunit β1. β1 is a single transmembrane spanning helix that modifies the

59 kinetics of Nav1.5 channel activation and inactivation and can alter the pharmacology of  
60 the Nav1.5  $\alpha$ -subunit (7-9). Gain-of-function mutations of Nav1.5 increase Na<sup>+</sup> currents  
61 and lead to LQTS Type 3 (LQT3) (10-12).

62  
63 Like Nav1.5, the Cav1.2  $\alpha$ -subunit contains four linked domains, DI-DIV, where each  
64 domain consists of 6 transmembrane segments S1-S6. S1-S4 form the VSD, where S4  
65 acts as the voltage sensor, and S5-S6 form the PD. Cav1.2 exists as a large  
66 macromolecular complex with the accessory subunits  $\beta$ 3 and  $\alpha$ 2 $\delta$  subunits that are  
67 important for membrane expression and alter channel activation and deactivation  
68 kinetics, respectively (13, 14). Cav1.2 undergoes both voltage-dependent inactivation  
69 and calcium-dependent inactivation (15, 16) which allows it to regulate Ca<sup>2+</sup> influx into  
70 the cardiomyocyte. Gain-of-function mutations of Cav1.2 increase Ca<sup>2+</sup> currents and  
71 lead to Long QT Type 8 (LQT8) (17, 18).

72 The voltage-gated K<sup>+</sup> channel, Kv7.1, along with the auxiliary subunit KCNE1, mediates  
73 an important repolarizing K<sup>+</sup> current, I<sub>Ks</sub> (19-21). The Kv7.1  $\alpha$ -subunit contains 6  
74 transmembrane segments, S1-S6. S1-S4 comprise the VSD, where S4 contains several  
75 positively charged amino acid residues that allow S4 to act as the voltage sensor of  
76 Kv7.1. S5-S6 segments comprise the channel PD. Kv7.1 forms a tetrameric channel,  
77 where 4 Kv7.1  $\alpha$ -subunits arrange to form a functional channel. The auxiliary  $\beta$ -subunit  
78 KCNE1 drastically modulates Kv7.1 channel voltage dependence, activation kinetics,  
79 and single-channel conductance (22, 23). Loss-of-function mutations in the Kv7.1  $\alpha$ -  
80 subunit and KCNE1  $\beta$ -subunit lead to reductions in I<sub>Ks</sub> and can lead to LQTS Type 1  
81 (LQT1) and Type 5 (LQT5) (24-28), respectively.

82 Polyunsaturated fatty acids (PUFAs) are amphipathic molecules that have been  
83 suggested to possess antiarrhythmic effects (29, 30). PUFAs are characterized by  
84 having a long hydrocarbon tail with two or more double bonds, as well as having a  
85 charged, hydrophilic head group (31). PUFAs, such as DHA and EPA, have been  
86 shown to prevent cardiac arrhythmias in animal models and cultured cardiomyocytes by  
87 inhibiting the activity of  $\text{Na}_v$  and  $\text{Ca}_v$  channels (30, 32-34). Specifically, DHA and EPA  
88 are thought to bind to discrete sites on the channel protein to stabilize the inactivated  
89 states of the  $\text{Na}_v$  and  $\text{Ca}_v$  channels (32, 35). Since the voltage sensors of  $\text{Na}_v$  and  $\text{Ca}_v$   
90 channels are relatively homologous, it has been suggested that PUFAs act on the  
91 voltage-sensing S4 segments that control inactivation in these channels (30, 32). Our  
92 group has demonstrated that PUFAs and PUFA analogues also modulate the activity of  
93 the  $\text{Kv7.1/KCNE1}$  channel and work to promote voltage-dependent activation of the  $\text{I}_{\text{Ks}}$   
94 current (36-38). The mechanism through which PUFAs promote  $\text{Kv7.1/KCNE1}$   
95 activation is referred to as the lipoelectric hypothesis which involves the following: 1) the  
96 PUFA molecule integrates into the membrane via its hydrocarbon tail and 2) the  
97 negatively charged PUFA head group electrostatically attracts the positively charged S4  
98 segment and facilitates the outward movement of S4, promoting  $\text{I}_{\text{Ks}}$  channel activation  
99 (36). Our group has also demonstrated that PUFAs and modified PUFAs exert a second  
100 effect on the pore of  $\text{Kv7.1}$  through an additional electrostatic interaction with a lysine  
101 residue (K326) in the S6 segment (39). This electrostatic interaction between the  
102 negatively charged PUFA head group and K326 leads to an increase in maximal  
103 conductance of the channel ( $G_{\text{max}}$ ) (39).

104

105 Some groups have suggested that PUFAs could modify Na<sub>v</sub> channels by causing a  
106 leftward shift in voltage dependent inactivation through an electrostatic effect on the  
107 voltage-sensing domains involved in inactivation (30, 32). It is possible that PUFAs  
108 modulate Kv7.1/KCNE1, Nav, and Cav channels by a similar mechanism by integrating  
109 next to the S4 voltage sensors and electrostatically attracting the voltage sensors  
110 toward their outward position. If PUFAs integrate preferentially next to the S4 that  
111 controls inactivation in Nav and Cav channels but next to all S4s in Kv7.1/KCNE1  
112 channels, PUFAs would promote activation in Kv7.1/KCNE1 channels but promote  
113 inactivation in Nav and Cav channels. Though both PUFAs and PUFA analogues are  
114 known to modulate different ion channel activities (i.e. processes underlying activation  
115 and inactivation), it is unclear whether specific PUFAs and PUFA analogues are  
116 selective for certain ion channels or if they broadly influence the activity of several  
117 different ion channels simultaneously.

118  
119 In this work, we characterize the channel-specific effects of different PUFAs and PUFA  
120 analogues in order to further understand which PUFAs and PUFA analogues would be  
121 the most therapeutically relevant in the treatment for different LQTS subtypes. We have  
122 found that PUFA analogues modulate Kv7.1/KCNE1, Cav1.2, and Nav1.5 through  
123 different mechanisms instead of through a shared mechanism. In addition, we  
124 demonstrate that PUFA analogues exhibit a broad range of differences in selectivity for  
125 Kv7.1/KCNE1, Cav1.2, and Nav1.5. Lastly, PUFA analogues that are more selective for  
126 Kv7.1/KCNE1 are able restore a prolonged ventricular action potential and prevent  
127 arrhythmia in simulated cardiomyocytes.

128 **Results**

129 *PUFA analogues modulate Kv7.1/KCNE1, Cav1.2, and Nav1.5 through distinct*  
130 *mechanisms.*

131 There are several studies supporting electrostatic activation of Kv7.1/KCNE1 channels  
132 by PUFA analogues (37-39, 41). PUFAs are known to inhibit Na<sub>v</sub> and Ca<sub>v</sub> channels, but  
133 there is little evidence on the mechanism of channel inhibition using a diverse set of  
134 PUFA analogues. Previous groups have suggested that PUFAs may inhibit Na<sub>v</sub> and Ca<sub>v</sub>  
135 channels by interacting with S4 voltage sensors and stabilizing the inactivated state  
136 since there are similarities between the voltage sensor profiles of Na<sub>v</sub> and Ca<sub>v</sub> channels.  
137 (30, 32-34). For this reason, we hypothesize that PUFA analogues inhibit Cav1.2 and  
138 Nav1.5 through a shared electrostatic mechanism on S4 voltage sensors, similar to that  
139 reported with Kv7.1/KCNE1 channels. But in the case of Na<sub>v</sub> and Ca<sub>v</sub> channels, PUFAs  
140 would left-shift the voltage dependence of inactivation instead of activation which is  
141 seen in Kv7.1/KCNE1. To compare the effects of different PUFA analogues on these  
142 three different channels, we here measure the currents from Kv7.1/KCNE1, Cav1.2, and  
143 Nav1.5 expressed in *Xenopus* oocytes using two-electrode voltage clamp.

144

145 We first illustrate the effects of a representative PUFA analogue Linoleoyl taurine (Lin-  
146 taurine) on the voltage dependence of activation and the conductance of Kv7.1/KCNE1  
147 (Fig. 1A-C). These effects are reflected in the tail current-voltage relationship where the  
148 effects on the voltage sensor are measured as a leftward shift in the voltage  
149 dependence of activation and the effects on the conductance are measured as a  
150 relative increase in the maximal conductance upon PUFA application (Fig. 1C). We also  
151 measure the effect of Lin-aurine on Cav1.2 and Nav1.5 channels (Figure 2-3). When  
152 we apply Lin-aurine to the Cav1.2 macromolecular complex (Fig. 2A), we see that Lin-  
153 taurine reduces  $Ca^{2+}$  currents in a dose-dependent manner (Fig. 2B-C). However, Lin-  
154 taurine reduces  $Ca^{2+}$  current without shifting the voltage-dependence of Cav1.2  
155 activation (Fig. 2B-C; Supplemental Fig. 1). We use a depolarizing pre-pulse protocol to  
156 measure changes in voltage-dependent inactivation (Fig. 2D-E). When we measure the  
157 effects of PUFA analogues on voltage-dependent inactivation, we see again a decrease  
158 in  $Ca^{2+}$  currents, but surprisingly no shift in voltage-dependent inactivation (Fig. 2D-E).  
159 This suggests that PUFA analogues do not inhibit Cav1.2 channels through a shared  
160 electrostatic mechanism on S4 voltage sensors that shifts the voltage dependence of  
161 S4 movement, but rather through a mechanism that reduces either the number of  
162 conducting channels (potentially through an effect on the pore) or the maximum  
163 conductance of each channel. When we apply Lin-aurine to Nav1.5 (Figure 3A) and  
164 measure voltage-dependent activation, we see a dose-dependent inhibition of  $Na^+$   
165 currents with no shift in the voltage dependence of activation (Fig. 3B-C; Supplemental  
166 Fig. 1). However, when we measured voltage-dependent inactivation of Nav1.5, we  
167 observed that PUFA analogues left-shift the voltage dependence of inactivation (Fig.



168 3D-E). In addition to the left-shift in voltage-dependent inactivation, we also observe a  
169 dose-dependent decrease in Nav1.5 currents (Fig. 3E). This suggests that PUFA  
170 analogues, while they do influence the voltage dependence of inactivation, may also  
171 have an additional effect on the conductance of Nav1.5, leading to the dose-dependent  
172 decrease in Na<sup>+</sup> currents seen on top of the leftward shift of the voltage dependence of  
173 inactivation.

174

175 Through these data, we observe that PUFA analogues modulate cardiac voltage-gated  
176 ion channels through non-identical mechanisms. PUFA analogues promote the  
177 activation of Kv7.1/KCNE1 through electrostatic effects that left-shift the voltage  
178 dependence of activation and an increase in the maximal conductance. PUFA  
179 analogues inhibit Cav1.2 channels through an apparent effect on the pore leading to a  
180 reduction in Ca<sup>2+</sup> current but without producing any leftward shift in the voltage  
181 dependence of inactivation. In addition, PUFA analogues inhibit Nav1.5 through a  
182 combination of a leftward shift in the voltage dependence of inactivation and an effect  
183 on the maximum conductance, which leads to a dose-dependent decrease in Na<sup>+</sup>  
184 current. Together these findings show that PUFA analogues affect Kv7.1/KCNE1,  
185 Nav1.5, and Cav1.2 channels through different mechanisms.

186

187

188 *PUFA analogues with taurine head groups are non-selective and broadly modulate*  
189 *multiple cardiac ion channels, with preference for Cav1.2 and Nav1.5.*

190 We have found through previous work that PUFA analogues with taurine head groups  
191 are good activators of the Kv7.1/KCNE1 channels due to the low pKa of the taurine  
192 head group (37, 38). Having a lower pKa allows the taurine head group to be fully  
193 negatively charged at physiological pH so that it has maximal electrostatic effects on  
194 Kv7.1/KCNE1 channels (38). We tested a set of PUFA analogues with taurine head  
195 groups on Kv7.1/KCNE1, Cav1.2, and Nav1.5 channels to determine if these effects are  
196 selective for the Kv7.1/KCNE1 channel or if taurine analogues also modulate Cav1.2  
197 and Nav1.5 channels. Lin-aurine is a PUFA analogue with a taurine head group (Figure  
198 4A) that promotes the activation of the cardiac Kv7.1/KCNE1 channel, by promoting a  
199 leftward shift in the voltage-dependence of activation by  $-39.9 \pm 3.6$  mV at  $7 \mu\text{M}$  ( $p =$   
200  $0.008$ ) (Fig 4B). In addition, the application of Lin-aurine produces a slight, but not  
201 statistically significant increase in the maximal conductance of the Kv7.1/KCNE1  
202 channel at  $7 \mu\text{M}$  ( $1.9 \pm 0.6$ ;  $p = 0.26$ ) (Fig. 4C). Lin-aurine inhibits Cav1.2 current in a  
203 dose-dependent manner without left-shifting the voltage dependence of inactivation for  
204 Cav1.2 ( $2.8 \pm 1.4$  mV;  $p = 0.17$ ), but instead by significantly decreasing the  $G_{\text{max}}$  at  $7 \mu\text{M}$   
205 ( $0.4 \pm 0.1$ ;  $p = 0.03$ ) (Fig. 4D-E). Lastly, Lin-aurine inhibits Nav1.5 current by left-  
206 shifting the voltage dependence of inactivation ( $-23.5 \pm 1.9$  mV;  $p = 0.001$ ) and also  
207 decreasing the  $G_{\text{max}}$  at  $7 \mu\text{M}$  ( $0.5 \pm 0.07$ ;  $p = 0.005$ ) (Fig 4F-G).

208  
209 N-arachidonoyl taurine (N-AT) is a PUFA analogue with a taurine head group that has  
210 been demonstrated by our group to promote activation of Kv7.1/KCNE1, left-shifting the

211 voltage-dependence and increasing the  $G_{\max}$  at 70  $\mu\text{M}$  (Fig. 5A) (38). Here, we used  
212 lower concentrations (0.2, 0.7, 2, 7, and 20  $\mu\text{M}$ ) with the goal of understanding the  
213 selectivity of N-AT for cardiac ion channels and at more therapeutically feasible  
214 concentrations. Application of N-AT does not promote activation of Kv7.1/KCNE1 in this  
215 lower concentration range, does not left-shift of the voltage-dependence of activation (-  
216  $1.8 \pm 2.6$  mV;  $p = 0.5$ ), and does not increase the  $G_{\max}$  at 7  $\mu\text{M}$  ( $0.9 \pm 0.03$ ;  $p = 0.98$ )  
217 (Fig. 5B-D). However, N-AT causes a dose-dependent decrease in Cav1.2 current,  
218 though does not cause a significant shift in the voltage dependence of inactivation ( $13.5$   
219  $\pm 3.8$  mV;  $p = 0.07$ ), nor does it cause a significant reduction in the overall  $G_{\max}$  ( $0.6 \pm$   
220  $0.1$ ;  $p = 0.06$ ) at 7  $\mu\text{M}$  (Fig. 5E-G). In addition, N-AT decreases Nav1.5 current,  
221 produces a leftward shift in voltage-dependent inactivation ( $-16.7 \pm 3.5$  mV;  $p = 0.04$ ),  
222 and significantly reduces the  $G_{\max}$  at 7  $\mu\text{M}$  ( $0.3 \pm 0.04$ ;  $p = 0.004$ ) (Fig. 5H-J). This data  
223 suggests that N-AT is more selective for Cav1.2 and Nav1.5, compared to  
224 Kv7.1/KCNE1.

225 Pinoleoyl taurine (Pin-aurine) promotes the activation of Kv7.1/KCNE1 in a dose-  
226 dependent manner (Fig. 6A-B). Pin-aurine, like Lin-aurine, promotes a leftward shift in  
227 the voltage dependence of activation ( $-23.8 \pm 2.7$  mV;  $p = 0.003$ ) and increases the  $G_{\max}$   
228 of Kv7.1/KCNE1 at 7  $\mu\text{M}$  with a trend towards significance ( $2.2 \pm 0.4$ ;  $p = 0.06$ ) (Fig.  
229 6C-D). Pin-aurine also inhibits Cav1.2 current, but does not significantly shift the  
230 voltage-dependence of inactivation ( $4.1 \pm 2.2$  mV;  $p = 0.13$ ) and does not significantly  
231 decrease the  $G_{\max}$  at 7  $\mu\text{M}$  ( $0.8 \pm 0.1$ ;  $p = 0.2$ ) (Fig. 6E-G). Pin-aurine inhibits Nav1.5  
232 currents and does so by significantly left-shifting the voltage dependence of inactivation

233  $(-16 \pm 2.7 \text{ mV}; p = 0.01)$  and decreasing the  $G_{\text{max}}$  at  $7 \mu\text{M}$  ( $0.4 \pm 0.09; p = 0.005$ ) (Fig.  
234 6H-J).

235 DHA-aurine promotes the activation of Kv7.1/KCNE1 channels in a dose-dependent  
236 manner, left-shifting the voltage-dependence of activation ( $-45.3 \pm 2.9 \text{ mV}; p = 0.004$ )  
237 and significantly increasing the  $G_{\text{max}}$  at  $7 \mu\text{M}$  ( $1.7 \pm 0.1; p = 0.03$ ) (Fig. 7A-C). DHA-  
238 taurine application results in dose-dependent inhibition of Cav1.2 current (Fig. 7E), but  
239 does not significantly left-shift the voltage-dependence of inactivation at  $7 \mu\text{M}$  ( $0.2 \pm 0.8$   
240  $\text{mV}; p = 0.85$ ) (Fig. 7F). Instead, DHA-aurine causes a significant decrease in the  $G_{\text{max}}$   
241 of Cav1.2 at  $7 \mu\text{M}$  ( $0.4 \pm 0.01; p < 0.001$ ) (Fig. 7G). Lastly, DHA-aurine inhibits Nav1.5  
242 by inducing a significant left-shift in the voltage-dependence of inactivation ( $-28.5 \pm 0.6$   
243  $\text{mV}; p < 0.001$ ) and decreasing the  $G_{\text{max}}$  at  $7 \mu\text{M}$  ( $0.05 \pm 0.01; p < 0.001$ ) (Fig. 7H-I).  
244 These results suggest that PUFA analogues with taurine head groups exhibit broad  
245 selectivity for multiple ion channels.

246

247

248 *PUFA analogues with glycine head groups tend to be more selective for Kv7.1/KCNE1*  
249 *with lower affinity for Cav1.2 and Nav1.5.*

250 PUFA analogues with glycine head groups have also been shown to effectively activate  
251 the Kv7.1/KCNE1 channel (37). The glycine head group has a lower pKa than regular  
252 PUFAs with a carboxyl head group (37), thereby allowing the head group to be more  
253 deprotonated and partially negatively charged at physiological pH. For this reason,  
254 PUFA analogues with glycine head groups are able to electrostatically activate  
255 Kv7.1/KCNE1 channels (37). We here tested several glycine compounds on

256 Kv7.1/KCNE1, Cav1.2, and Nav1.5 channels to determine whether they have selective  
257 or non-selective effects on cardiac ion channels.

258

259 We first examined Linoleoyl glycine (Lin-glycine). Lin-glycine promotes the activation of  
260 the cardiac Kv7.1/KCNE1 channel by left-shifting the voltage dependence of channel  
261 activation to more negative voltages at 7  $\mu$ M ( $-23.8 \pm 1.6$  mV;  $p < 0.001$ ). Application of  
262 Lin-glycine also increases the  $G_{\max}$  of Kv7.1/KCNE1 at 7  $\mu$ M ( $2.3 \pm 0.2$ ;  $p = 0.008$ ) (Fig.  
263 8A-D). Lin-glycine inhibits Cav1.2 in a dose-dependent manner (Fig. 8E), but does not  
264 left shift the voltage dependence of inactivation ( $0.6 \pm 2.3$  mV;  $p = 0.65$ ). Instead, Lin-  
265 glycine produces a decrease of the  $G_{\max}$  at 7  $\mu$ M, but this decrease is not statistically  
266 significant ( $0.3 \pm 0.2$ ;  $p = 0.07$ ) (Fig. 8F-G). Lin-glycine causes a dose-dependent  
267 decrease of Nav1.5 current, left-shifts the voltage dependence of inactivation ( $-15.2 \pm$   
268  $2.8$  mV;  $p = 0.01$ ), and reduces the  $G_{\max}$  at 7  $\mu$ M ( $0.5 \pm 0.1$ ;  $p = 0.007$ ) (Fig. 8H-J).

269

270 Pinoleoyl glycine (Pin-glycine) promotes the activation of Kv7.1/KCNE1 channels in a  
271 dose-dependent manner (Fig. 9A-B). Pin-glycine induces a left-shift in the voltage-  
272 dependence of activation ( $-8.7 \pm 1.8$  mV;  $p = 0.04$ ) and increases the  $G_{\max}$  at 7  $\mu$ M ( $1.7$   
273  $\pm 0.1$ ;  $p = 0.03$ ) (Fig. 9C-D). Pin-glycine, however causes little inhibition of Cav1.2  
274 current (Fig. 9E). Pin-glycine produces no shift in the voltage dependence of inactivation  
275 ( $-3.1 \pm 4.2$  mV;  $p = 0.54$ ) and does not significantly reduce the  $G_{\max}$  of Cav1.2 channels  
276 at 7  $\mu$ M ( $0.8 \pm 0.1$ ;  $p = 0.34$ ) (Fig. 9F-G). Pin-glycine inhibits Nav1.5 channels in a dose-  
277 dependent manner, but does not produce a significant left-shift in the voltage

278 dependence of inactivation at 7  $\mu\text{M}$  ( $-4.7 \pm 1.9$  mV;  $p = 0.09$ ). However, there is a  
279 statistically significant reduction in the  $G_{\text{max}}$  at 7  $\mu\text{M}$  ( $0.7 \pm 0.08$ ;  $p = 0.03$ ) (Fig. 9I-J).  
280 DHA-glycine promotes the dose-dependent activation of Kv7.1/KCNE1 channels (Fig.  
281 10A-B), left-shifting the voltage-dependence of activation ( $-10.5 \pm 1.0$  mV;  $p = 0.002$ ), and  
282 increasing the  $G_{\text{max}}$  at 7  $\mu\text{M}$  ( $1.9 \pm 0.2$ ;  $p = 0.03$ ) (Fig. 10C-D). However, DHA-glycine  
283 does not result in a dose-dependent decrease in  $\text{Ca}^{2+}$  currents (Fig. 10E). DHA-glycine  
284 does not left-shift the voltage dependence of inactivation ( $7.6 \pm 3.1$  mV;  $p = 0.13$ ) and  
285 does not significantly decrease the  $G_{\text{max}}$  of Cav1.2 at 7  $\mu\text{M}$  ( $1.0 \pm 0.1$ ;  $p = 0.98$ ) (Fig.  
286 10G). In addition, DHA-glycine produces some inhibition of Nav1.5, but only when  
287 applied at 20  $\mu\text{M}$  (Fig. 10H). While DHA-glycine produces a small, but significant left-  
288 shift in voltage dependent inactivation at 7  $\mu\text{M}$  ( $-4.8 \pm 1.9$  mV;  $p = 0.01$ ), it does not  
289 significantly reduce the  $G_{\text{max}}$  at 7  $\mu\text{M}$  ( $0.7 \pm 0.08$ ;  $p = 0.84$ ) (Fig. 10H-J).

290  
291 These results suggest that PUFA analogues with glycine head groups tend to be more  
292 selective for the cardiac Kv7.1/KCNE1 channel and tend to have lower apparent affinity  
293 for Cav1.2 and Nav1.5 channels. Pin-glycine and DHA-glycine both have more selective  
294 effects on the Kv7.1/KCNE1 channel and lower apparent affinity for Cav1.2 and Nav1.5  
295 channels compared to PUFA analogues with taurine head groups. Lin-glycine, however,  
296 is less selective for Kv7.1/KCNE1 channels compared to Pin-glycine and DHA-glycine.  
297 Lin-glycine modulates Kv7.1/KCNE1 and Cav1.2 at similar concentrations, while the  
298 modulatory effects of Lin-glycine on Nav1.5 take place at higher concentrations. This  
299 suggests that the combination of a glycine head group and linoleic acid tail boosts the  
300 apparent affinity for Cav1.2 and Nav1.5 channels.

301 *PUFA analogues with glycine head groups activate  $I_{Ks}$  with higher apparent affinity*  
302 *compared to  $I_{Ca}$  and  $I_{Na}$ .*

303 We have observed that PUFA analogues have several different effects on the same  
304 channel (e.g. they alter voltage dependence and conductance at the same time). To  
305 evaluate the totally effects of PUFA analogues on channel currents at 0 mV ( $I/I_0$ ), we  
306 compared the dose response curves for  $I_{Ks}$  (Kv7.1/KCNE1),  $I_{CaL}$  (Cav1.2), and  $I_{NaV}$   
307 (Nav1.5) (Table 1). At 0 mV, 7  $\mu$ M N-AT does not increase  $I_{Ks}$  currents, but instead  
308 inhibits  $I_{CaL}$  currents and almost completely inhibits  $I_{NaV}$  currents (Fig. 11A; Table 1). By  
309 comparing the dose response curves and  $K_m$  (a measure of apparent binding affinity) for  
310 each channel current, we find that N-AT has similar apparent affinity for  $I_{Ks}$ ,  $I_{CaL}$ , and  
311  $I_{NaV}$ . At 7  $\mu$ M, Lin-aurine increases  $I_{Ks}$  (though not significantly) while significantly  
312 inhibiting  $I_{CaL}$  and  $I_{NaV}$ , and exhibits higher apparent affinity for  $I_{CaL}$  and  $I_{NaV}$  than for  $I_{Ks}$   
313 (Fig. 11B; Table 1). Similar to Lin-aurine, Pin-aurine and DHA-aurine increase  $I_{Ks}$  but it  
314 also inhibit  $I_{CaL}$  and  $I_{NaV}$  with higher apparent affinity for  $I_{CaL}$  and  $I_{NaV}$  than for  $I_{Ks}$  (Fig.  
315 11C-D; Table 1). At 7  $\mu$ M, Lin-glycine increases  $I_{Ks}$ , but also inhibits  $I_{CaL}$  and  $I_{NaV}$  with  
316 higher apparent affinity for  $I_{CaL}$  than for  $I_{Ks}$  and  $I_{NaV}$  (Fig. 11E; Table 1). At 7  $\mu$ M, Pin-  
317 glycine increases  $I_{Ks}$ , but does not significantly inhibit  $I_{CaL}$  or  $I_{NaV}$ . When we compare the  
318  $K_m$  from the dose response curves of each channel current, we find that Pin-glycine has  
319 higher apparent affinity for  $I_{Ks}$  compared to  $I_{NaV}$  (Fig. 11F; Table 1). Lastly, at 7  $\mu$ M,  
320 DHA-glycine increases  $I_{Ks}$  with little effect on  $I_{CaL}$  and  $I_{NaV}$ , exhibiting higher apparent  
321 affinity for  $I_{Ks}$  and  $I_{CaL}$  than for  $I_{NaV}$  (Fig. 11G; Table 1). Overall, when we compare the  
322 effects of different PUFA analogues on  $I_{Ks}$ ,  $I_{NaV}$ , and  $I_{CaL}$ , PUFA analogues with taurine

323 head groups tend to have higher apparent affinity for  $I_{NaV}$  and  $I_{CaL}$ , whereas PUFA  
324 analogues with glycine head groups tend to have higher apparent affinity for  $I_{Ks}$ .

325

326 *Selective Kv7.1/KCNE1 channel activators have antiarrhythmic effects in the simulated*  
327 *cardiomyocyte*

328 We next tried to understand what kind of compound is the most effective at shortening  
329 the action potential duration. To determine whether selective PUFA analogues or non-  
330 selective PUFA analogues can shorten the action potential duration, we simulated the  
331 effects of applying the PUFA analogues on human cardiomyocyte using the O'Hara-  
332 Rudy dynamic (ORd) model (40) while modifying parameters for the voltage  
333 dependence and conductance for individual channels to reflect our experimental PUFA-  
334 induced effects. We simulated the effects of PUFA analogues that are non-selective  
335 modulators for cardiac ion channels (i.e. N-AT, Lin-aurine, Pin-aurine, DHA-aurine,  
336 and Lin-glycine) at concentrations of 0.7  $\mu$ M, 2  $\mu$ M, and 7  $\mu$ M (Fig. 12A-E). In most  
337 cases, we saw little change in the ventricular action potential until we reached 7  $\mu$ M  
338 where we were unable to elicit an action potential (Fig. 12A-E). One exception was the  
339 effect of applying DHA-aurine, in which case we observed a small shortening of the  
340 action potential at 0.7  $\mu$ M, but then an abnormal action potential upstroke and  
341 prolongation of the action potential at 2  $\mu$ M (Fig 12D). This is likely due to the potent  
342 block of Nav1.5 channels, causing the action potential to be largely calcium dependent.  
343 But again, at 7  $\mu$ M DHA-aurine, we were unable to elicit an action potential (Fig. 12D).  
344 However, the PUFA analogues that were more selective for Kv7.1/KCNE1, such as Pin-  
345 glycine and DHA-glycine (at 7  $\mu$ M) induce a slight shortening of the wild type ventricular



346 action potential (Fig. 12F-G). For Pin-glycine and DHA-glycine, we induced Long QT  
347 Type 2 by simulating 25% block of the hERG channel, which generates the rapid  
348 component of the delated rectifier potassium current ( $I_{Kr}$ ). 25% hERG block prolongs the  
349 ventricular action potential by 50 ms. Application of Pin-glycine or DHA-glycine at 7  $\mu$ M  
350 in the simulation partially restores the duration of the ventricular action potential. In  
351 addition to simulating the effects of PUFA analogues on the ventricular action potential  
352 duration, we also simulated the ability of 7  $\mu$ M DHA-glycine (the most selective  
353 Kv7.1/KCNE1 activator) to prevent arrhythmia by simulating early afterdepolarizations  
354 using 0.1  $\mu$ M dofetilide. Dofetilide is a blocker of the hERG channel and increases the  
355 susceptibility for early afterdepolarizations (40) (Fig. 12H). When we simulate 0.1  $\mu$ M  
356 dofetilide + 7  $\mu$ M DHA-glycine, we are able to suppress early afterdepolarizations,  
357 suggesting that the application of 7  $\mu$ M DHA-glycine would be anti-arrhythmic (Fig.  
358 12H).

359

## 360 Discussion

361 We show here that PUFAs have different mechanisms of action on Kv7.1/KCNE1,  
362 Cav1.2, and Nav1.5 channels. We have previously shown that PUFAs promote the  
363 activation of Kv7.1/KCNE1 channels through the lipoelectric mechanism where the  
364 negatively charged PUFA head group electrostatically attracts both the S4 voltage  
365 sensor (facilitating its upward movement and channel opening) and K326 in S6  
366 (increasing the maximal conductance) (36, 39, 42). In both Cav1.2 and Nav1.5  
367 channels, PUFAs inhibit channel currents. We have found that PUFAs cause a dose-  
368 dependent reduction in the currents through in Cav1.2 channels, surprisingly with no

369 effect on the voltage dependence of either activation or inactivation. In Nav1.5  
370 channels, PUFAs cause inhibition through a dose-dependent decrease in currents, with  
371 both a left-shifting effect on the voltage dependence of inactivation and a decrease in  
372 conductance. We also demonstrate that PUFA analogues vary in their selectivity for  
373 voltage-gated ion channels. The selectivity depends on the specific concentration of  
374 PUFA applied, because several compounds have non-overlapping dose response  
375 curves for their effects on the three different channels (Fig. 11). We also found that  
376 PUFAs with taurine head groups tend to have broad modulatory effects on  
377 Kv7.1/KCNE1, Nav1.5 and Cav1.2 channels, with higher apparent affinity for Cav1.2  
378 and Nav1.5 channels. Conversely, PUFAs with glycine head groups tend to be more  
379 selective for Kv7.1/KCNE1 channels and display lower apparent affinity for Cav1.2 and  
380 Nav1.5 channels. By understanding the effects of PUFA analogues on individual  
381 channels, it opens up the possibility to target specific forms of LQTS in which specific  
382 channels are mutated.

383

384 In this work, we have demonstrated that PUFA analogues modulate several different  
385 voltage-gated ion channels, including those underlying the ventricular action potential:  
386 Kv7.1/KCNE1, Nav1.5, and Cav1.2. The effects of PUFAs on Kv7.1/KCNE1, Cav1.2,  
387 and Nav1.5 individually are anticipated to have anti-arrhythmic effects and would  
388 potentially be beneficial for patients with Long QT Syndrome. In the case of  $I_{Ks}$   
389 (Kv7.1/KCNE1) currents, PUFAs would be anti-arrhythmic by rescuing loss-of-function  
390 mutants of Kv7.1/KCNE1 ( $I_{Ks}$ ) channels in Long QT Type 1 (KCNQ1 mutations) or 5  
391 (KCNE1 mutations). In the case of  $Na_v$  and  $Ca_v$  currents, PUFAs would be anti-

392 arrhythmic by inhibiting gain-of-function mutants of Nav1.5 and Cav1.2 channels in  
393 Long QT Type 3 or 7, respectively. We used the O'Hara-Rudy Dynamic model to  
394 simulate the ventricular action potential in the presence of different PUFAs. In our  
395 simulations, PUFAs that are non-selective (i.e. that activate Kv7.1/KCNE1 while  
396 inhibiting Cav1.2 and Nav1.5) prevent the generation of an action potential. However,  
397 when we simulate the effects of Pin-glycine and DHA-glycine, which are both more  
398 selective for Kv7.1/KCNE1, we see a shortening in the action potential duration and the  
399 suppression of early afterdepolarizations. This suggests that selectively boosting  $I_{Ks}$   
400 (Kv7.1/KCNE1) current would be important for shortening and terminating the  
401 ventricular action potential. However, evaluating PUFA-induced effects on  
402 Kv7.1/KCNE1, Cav1.2, and Nav1.5 channels bearing LQTS-causing mutations would  
403 be the next step in understanding the therapeutic potential for PUFA analogues as  
404 treatments for different forms of LQTS.

405  
406 In our experiments using PUFA analogues on Nav1.5, we observed both a shift in the  
407 voltage dependence of inactivation and a dose-dependent decrease in  $Na^+$  currents.  
408 Extensive work has been done to characterize how each of the different voltage-sensing  
409 domains in Nav channels contribute to voltage-dependent activation and inactivation,  
410 many implicating DIV S4 in fast inactivation (6, 43). Recent work by Hsu and colleagues  
411 (2017) has also shown using voltage clamp fluorometry, the importance of both DIII and  
412 DIV in Nav channel inactivation (44). Our data suggest that PUFAs may interact with S4  
413 segments involved in voltage-dependent inactivation, allowing PUFA analogues to left-  
414 shift the voltage dependence of inactivation. However, this does not completely explain

415 the additional dose-dependent decrease in Na<sup>+</sup> currents we observe on top of the  
416 leftward shifted voltage dependence of inactivation. Recent work by Nguyen and  
417 colleagues (2018) has uncovered a mechanism of Na<sub>v</sub> channel inhibition through a new  
418 pathway, allowing a hydrophobic molecules to permeate a fenestration between  
419 domains III and IV (DIII and DIV) in the human cardiac Nav1.5 channel (45). It is  
420 possible that the hydrophobic PUFA analogue also block Nav1.5 channels through this  
421 fenestration between DIII and DIV, causing the voltage-independent decrease in sodium  
422 currents.

423 The molecular mechanism of action of PUFA analogues on Cav1.2 is still unclear,  
424 though we have shown that it does not occur through a shift in the voltage dependence  
425 of inactivation. In each case of Cav1.2 inhibition by PUFA analogues, we observe a  
426 dose-dependent decrease in the Ca<sup>2+</sup> currents that appears as a linear decrease in I/I<sub>0</sub>  
427 and G<sub>max</sub>. There is evidence that some Ca<sub>v</sub> channel antagonists, such as  
428 dihydropyridines (DHPs) inhibit Ca<sub>v</sub> channels through an allosteric mechanism (46).  
429 Pepe and colleagues (1994) found that DHA alters the effectiveness of  
430 dihydropyridines, suggesting a shared binding site, or nearby binding sites, for DHPs  
431 and PUFAs (47). Tang and colleagues (2016) found that dihydropyridines bind in a  
432 hydrophobic pocket near the pore of the bacterial Ca<sub>v</sub>Ab channel and cause an  
433 allosteric conformational change that leads to disruption of the selectivity filter and thus  
434 inhibition of Ca<sup>2+</sup> currents (46). In addition, they observed that in the absence of DHPs a  
435 phospholipid occupies the DHP binding site (46). This would suggest that it is possible  
436 that PUFA analogues inhibit Cav1.2 by binding to, or near, the DHP binding site and  
437 causing an allosteric conformational change that leads to a collapse of the pore and

438 thus explaining the inhibition of Cav1.2 currents without any changes in the voltage  
439 dependence of inactivation.

440 Work from several groups has demonstrated a shared electrostatic mechanism of action  
441 on voltage-gated K<sup>+</sup> channels (48) and voltage-gated Na<sup>+</sup> channels (49) by biaryl  
442 sulfonamides. Liin and colleagues (2018) showed that biaryl sulfonamides promote the  
443 activation of the Shaker K<sup>+</sup> channel through an electrostatic effect on the voltage sensing  
444 domain. In addition, Ahuja and colleagues (2015) showed that aryl sulfonamides inhibit  
445 Na<sub>v</sub> channels through an electrostatic “voltage sensor trapping” mechanism that is  
446 specific for the Nav1.7 isoform. The work by Ahuja et al. supports the ability to  
447 pharmacologically target different ion channels with a high degree of selectivity (49). This  
448 is in agreement with our findings using PUFA analogues that show that PUFA analogues  
449 are variable in their channel selectivity, allowing us to target particular ion channels  
450 involved in the ventricular action potential.

451 Our experiments were conducted using the *Xenopus laevis* oocyte expression system,  
452 where voltage-clamp recordings were performed at room temperature. It is possible that  
453 there may be temperature differences in the ways PUFA analogues modify different ion  
454 channels that we are unable to capture by conducting experiments at 20°C. There is  
455 also the possibility that the membrane composition may differ between *Xenopus*  
456 oocytes and mammalian cells or cardiomyocytes. However, using *Xenopus* oocytes, we  
457 are able to measure distinct differences between mechanisms of PUFA modulation in  
458 Kv7.1/KCNE1, Cav1.2, and Nav1.5 in isolation. To further confirm our findings,  
459 experiments should be conducted in mammalian cells or cardiomyocytes to determine

460 the effects of different PUFA analogues on individual ion channels and the duration of  
461 the ventricular action potential at physiological temperatures.

462 The work presented here demonstrates that PUFA analogues exert diverse modulatory  
463 effects on different types of voltage-gated ion channels through non-identical  
464 mechanisms. Because PUFA analogues modulate Kv7.1/KCNE1 channels through  
465 electrostatic effects, we hypothesized they would have similar effects on Cav1.2 and  
466 Nav1.5 channels. However, our data suggests that PUFA analogues can exert various  
467 modulatory effects on the activity of different ion channels, and that the mechanism  
468 depends on the ion channel that is being modulated. In addition, we have shown that  
469 PUFA analogues exhibit a range of selectivity for different ion channels, which depends  
470 both on the PUFA head group and the combination of PUFA head and tail groups. Using  
471 simulations of the ventricular action potential, we have shown that selective Kv7.1/KCNE1  
472 channel activators are the most effective at shortening a prolonged ventricular action  
473 potential and suppressing early afterdepolarizations induced by hERG block. This  
474 suggests that boosting Kv7.1/KCNE1 currents by using selective Kv7.1/KCNE1 channel  
475 activators can aid in restoring a normal action potential duration and possess  
476 antiarrhythmic potential.

477

478

## 479 **Methods**

### 480 *Molecular Biology*

481 cRNA encoding Kv7.1 and KCNE1, Nav1.5 and  $\beta$ 1, and Cav1.2,  $\beta$ 3, and  $\alpha$ 2 $\delta$  were  
482 transcribed using the mMessage mMachine T7 kit (Ambion). 50 ng of cRNA was  
483 injected into defolliculated *Xenopus laevis* oocytes (Ecocyte, Austin, TX): For  
484 Kv7.1/KCNE1 channel expression, we injected a 3:1, weight:weight (Kv7.1:KCNE1)  
485 cRNA ratio. For Nav1.5 channel expression, we injected a 2:1, weight:weight  
486 (Nav1.5: $\beta$ 1) cRNA ratio. For Cav1.2 channel expression, we injected a 2:1:1,  
487 weight:weight (Cav1.2: $\beta$ 3: $\alpha$ 2 $\delta$ ) cRNA ratio. Injected cells were incubated for 72-96  
488 hours in standard ND96 solution (96 mM NaCl, 2 mM KCl, 1 mM MgCl<sub>2</sub>, 1.8 mM CaCl<sub>2</sub>,  
489 5 mM HEPES; pH = 7.5) containing 1 mM pyruvate at 16°C prior to electrophysiological  
490 recordings.

491

### 492 *Two-electrode voltage clamp (TEVC)*

493 *Xenopus laevis* oocytes were recorded in the two-electrode voltage clamp (TEVC)  
494 configuration. Recording pipettes were filled with 3 M KCl. The recording chamber was  
495 filled with ND96 (96 mM NaCl, 2 mM KCl, 1 mM MgCl<sub>2</sub>, 1.8 mM CaCl<sub>2</sub>, 5 mM HEPES;  
496 pH 7.5). For Cav1.2 channel recordings, *Xenopus* oocytes were injected with 50 nl of  
497 100 mM EGTA and incubated at 10°C for 30 minutes prior to electrophysiological  
498 recordings in order to sequester cytosolic calcium. In addition, Cav1.2 channel  
499 recordings were done in Ca<sup>2+</sup>-free solutions, using Ba<sup>2+</sup> as the charge carrier, to prevent  
500 calcium-dependent inactivation of Cav1.2 channels. PUFAs were obtained from  
501 Cayman Chemical (Ann Arbor, MI.) or synthesized in house (Linköping, Sweden)  
502 through methods previously described (Bohannon et al., submitted) and kept at -20°C

503 as 100 mM stock solutions in ethanol. Serial dilutions of the different PUFAs were  
504 prepared from stocks to make 0.2  $\mu$ M, 0.7  $\mu$ M, 2  $\mu$ M, 7  $\mu$ M, and 20  $\mu$ M concentrations in  
505 ND96 solutions (pH = 7.5). PUFAs were perfused into the recording chamber using the  
506 Rainin Dynamax Peristaltic Pump (Model RP-1) (Rainin Instrument Co., Oakland, CA.  
507 USA).

508  
509 Electrophysiological recordings were obtained using Clampex 10.3 software (Axon,  
510 pClamp, Molecular Devices). To measure Kv7.1/KCNE1 currents we apply PUFAs as  
511 the membrane potential is stepped every 30 sec from -80 mV to 0 mV for 5 seconds  
512 before stepping to -40 mV and back to -80 mV to ensure that the PUFA effects on the  
513 current at 0 mV reached steady state. A voltage-step protocol was used to measure the  
514 current vs. voltage (I-V) relationship before PUFA application and after the PUFA effects  
515 had reached steady state for each concentration of PUFA. Cells were held at -80 mV  
516 followed by a hyperpolarizing prepulse to -140 mV. The voltage was then stepped from -  
517 100 to 60 mV (in 20 mV steps) followed by a subsequent voltage step to -20 mV to  
518 measure tail currents before returning to the -80 mV holding potential. For Cav1.2  
519 channel recordings, PUFAs are applied as the membrane potential is stepped from -80  
520 mV to -30 mV and then 10 mV before returning to the holding potential of -80 mV. This  
521 allows the PUFA effects to reach steady state before recording voltage-dependent  
522 activation and inactivation. To measure voltage-dependent activation of Cav1.2, cells  
523 are held again at -80 mV and then stepped from -70 mV to 40 mV (in 10 mV steps).  
524 Voltage-dependent inactivation was measured by holding cells at -80 mV, applying a  
525 500-ms conditioning prepulse at voltages between -80 mV and 20 mV (in 10 mV steps)



526 before stepping to a test pulse of 10 mV to measure the remaining current and returning  
527 to -80 mV holding potential. For Nav1.5 channel recordings, PUFAs are applied as the  
528 membrane potential is stepped from -80 mV to -90 mV for 480 ms before stepping to 30  
529 mV for 50 ms and returned to a holding potential of -80 mV. This allows the PUFA  
530 effects to reach steady state before recording voltage-dependent activation and  
531 inactivation. To measure voltage-dependent activation of Nav1.5, cells are held at -80  
532 mV and then stepped from -90 mV to 40 mV (in 10 mV steps) and then returning to -80  
533 mV holding potential. Voltage-dependent inactivation was measured by holding cells at -  
534 80 mV, applying a 500-ms conditioning prepulse at voltages between -140 mV and -30  
535 mV (in 10 mV steps) and measuring the remaining current at a test pulse of -30 mV  
536 before returning to -80 mV holding potential.

537

538

539 *Data analysis*

540 Tail currents from Kv7.1/KCNE1 measures were analyzed using Clampfit 10.3 software  
541 in order to obtain conductance vs. voltage (G-V) curves. The  $V_{0.5}$ , the voltage at which  
542 half the maximal current occurs, was obtained by fitting the G-V curves from each  
543 concentration of PUFA with a Boltzmann equation:

544 
$$G(V) = \frac{G_{max}}{1 + e^{\frac{(V_1 - V)/s}{2}}}$$

545 where  $G_{max}$  is the maximal conductance at positive voltages and  $s$  is the slope factor in  
546 mV. The current values for each concentration at 0 mV ( $I/I_0$ ) were used to plot the dose  
547 response curves for each PUFA. These dose response curves were fit using the Hill  
548 equation in order to obtain the  $K_m$  value for each PUFA:

549  
550 
$$\frac{I}{I_0} = 1 + \frac{A}{1 + \frac{K_m^n}{x^n}}$$

551  
552 where  $A$  is the fold increase in the current caused by the PUFA at saturating  
553 concentrations,  $K_m$  is the apparent affinity of the PUFA, and  $n$  is the Hill coefficient. The  
554 maximum conductance ( $G_{max}$ ) was calculated by taking the difference between the  
555 maximum and minimum current values (using the G-V curve for each concentration)  
556 and then normalizing to control solution (0  $\mu$ M). In Cav1.2 and Nav1.5 channels, peak  
557 currents (normalized to the peak values in control ND96) were used to determine PUFA  
558 induced changes in  $I/I_0$ ,  $\Delta V_{0.5}$  of inactivation, and  $G_{max}$ . Graphs plotting  $I/I_0$ ,  $\Delta V_{0.5}$ ,  $G_{max}$ ,  
559 and  $K_m$  were generated using the Origin 9 software (Northampton, MA.). To determine if  
560 there were significant differences between apparent binding affinity of individual PUFA

561 analogues for Kv7.1/KCNE1, Cav1.2, or Nav1.5 we conducted One-way ANOVA  
562 followed by Tukey's HSD for multiple comparisons when comparing all three channels  
563 or Student's t-test when comparing the apparent affinity for two channels. To determine  
564 if the PUFA-induced effects on  $I/I_0$ ,  $\Delta V_{0.5}$ , or  $G_{\max}$  were statistically significant we  
565 conducted Student's t-test on the PUFA-induced effects at 7  $\mu\text{M}$ . Significance  $\alpha$ -level  
566 was set at  $p < 0.05$  – asterisks denote significance:  $p < 0.05^*$ ,  $p < 0.01^{**}$ ,  $p < 0.001^{***}$ ,  $p$   
567  $< 0.0001^{****}$ .

## 568 569 *Simulations*

570 The effects of individual PUFA analogues were simulated on each ion channel using  
571 Berkeley Madonna modeling software and equations from the MATLAB code in the  
572 O'Hara and Rudy Dynamic (ORd) model (40). We individually simulated the  
573 Kv7.1/KCNE1, Cav1.2, and Nav1.5 channels in Madonna and altered the parameters  
574 suggested to be modulated by PUFA binding to recapitulate our voltage clamp data  
575 from *Xenopus* oocytes. For example, to model the effects observed on the cardiac  $I_{Ks}$   
576 channel, we modified the voltage dependence of channel activation by shifting the  $V_{0.5}$   
577 as well as multiplying the  $I_{Ks}$  conductance by the factor increase we observed in our  
578 experiments at a given PUFA concentration.

579  
580 MATLAB simulations of the ventricular action potential in the epicardium of the heart  
581 were performed using the ORd model (40). To simulate the effects of PUFAs, we  
582 introduced the same modified parameters in the MATLAB code as we used to model  
583 the PUFA effects on the ionic currents in Berkeley Madonna. We made simultaneous  
584 changes to Kv7.1/KCNE1, Cav1.2, and Nav1.5 for a given PUFA and specific PUFA

585 concentration to model the effects of different PUFA analogues on the ventricular action  
586 potential under wild type and LQTS conditions. To simulate susceptibility to early  
587 afterdepolarizations, hERG block by 0.1  $\mu$ M dofetilide was simulated which previously  
588 has been shown to cause spontaneous early afterdepolarizations (40). To simulate the  
589 ability of PUFA analogues to suppress early afterdepolarizations, we altered the activity  
590 of Kv7.1/KCNE1, Cav1.2, and Nav1.5 channels according to the PUFA-induced effects  
591 observed during experiments.  
592  
593

594 **Acknowledgements**

595 We thank Levi Lindroos, Victor Kornfeld, Siri Lundholm, and Sankhero Gewarges for  
596 their contributions during their time as visiting scholars.

597

598 **Conflict of Interest**

599 SIL, HPL: A patent application (62/032,739) has been submitted by the University of  
600 Miami with SIL and HPL as inventors. The other authors declare no other competing  
601 interests.

602

603 **Author Contributions**

604 BMB, Acquisition of data, Analysis and interpretation of data, Drafting or revising the  
605 article; HPL, Conception and design, Analysis and interpretation of data, Drafting or  
606 revising the article; SIL, Conception and design, Acquisition of data, Analysis and  
607 interpretation of data, Drafting or revising the article; MEP, Acquisition of data; XW,  
608 Acquisition of data.

609

610 **Funding**

611 This work was supported by NIH R01-HL131461 (to H. Peter Larsson) and by the  
612 Swedish Society for Medical Research and the Swedish Research Council (2017-  
613 02040) (to Sara I. Liin).

614

615

## 616 References

- 617 1. Mohrman D, Heller L. Cardiovascular Physiology. 7 ed: McGraw Hill Co.; 2010.
- 618 2. Nerbonne J, Kass R. Molecular Physiology of Cardiac Repolarization. Physiological Reviews.  
619 2005;85:1205-53. doi: doi:10.1152/physrev.00002.2005.
- 620 3. Alders M, Christiaans I. Long QT Syndrome. Gene Reviews. 2003.
- 621 4. Bohnen M, Peng G, Robey S, Terrenoire C, Iyer V, Sampson K, Kass R. Molecular Pathophysiology  
622 of Congenital Long QT Syndrome. Physiology Reviews. 2017;97:46.
- 623 5. Chanda B, Bezanilla F. Tracking Voltage-dependent Conformational Changes in Skeletal Muscle  
624 Sodium Channel during Activation. Journal of General Physiology. 2002;120:629-45.
- 625 6. Capes D, Goldschen-Ohm M, Arcisio-Miranda M, Bezanilla F, Chanda B. Domain IV voltage-  
626 sensor movement is both sufficient and rate limiting for fast inactivation in sodium channels. Journal of  
627 General Physiology. 2013;142:101-12.
- 628 7. Barro-Soria R, Liin S, Larsson H. Using fluorescence to understand  $\beta$  subunit-Nav channel  
629 interactions. The Journal of General Physiology. 2017;149:757-62.
- 630 8. Xiao Y, Wright S, Wang G, Morgan J, Leaf A. Coexpression with  $\beta_1$ -subunit modifies the kinetics  
631 and fatty acid block of hH1 $\alpha$  Na<sup>+</sup> channels. American Journal of Physiology. 2000;279:12.
- 632 9. Zhu W, Voelker T, Varga Z, Schubert A, Nerbonne J, Silva J. Mechanisms of noncovalent  $\beta$   
633 subunit regulation of Nav channel gating. The Journal of General Physiology. 2017;149:813-31.
- 634 10. Fernandez-Falgueras A, Sarquella-Brugada G, Brugada J, Brugada R, Campuzano O. Cardiac  
635 Channelopathies and Sudden Death: Recent Clinical and Genetic Advances. Biology. 2017;6:21.
- 636 11. Calloe K, Refaat M, Grubb S, Wojciak J, Campagna J, Thomsen N, Nussbaum R, Scheinman M,  
637 Schmitt N. Characterization and Mechanisms of Action of Novel Nav1.5 Channel Mutations Associated  
638 with Brugada Syndrome. Circulation Arrhythmia Electrophysiology. 2013:177-84. doi: DOI:  
639 10.1161/CIRCEP.112.974220.
- 640 12. Rivolta I, Clancy C, Tateyama M, Liu H, Priori S, Kass R. A novel SCN5A mutation associated with  
641 long QT-3: altered inactivation kinetics and channel dysfunction. Physiological Genomics. 2002;10:191-7.
- 642 13. Rougier J, Abriel H. Cardiac voltage-gated calcium channel macromolecular complexes.  
643 Biochimica et Biophysica Acta. 2016;1863:1806-12.
- 644 14. Chen Y, Li M, Zhang Y, He L, Yamada Y, Fitzmaurice A, Shen Y, Zhang H, Tong L, Yang J. Structural  
645 basis of the  $\alpha_1$ - $\beta$  subunit interaction of voltage-gated Ca<sup>2+</sup> channels. Nature. 2004;429:675-80.
- 646 15. Stotz S, Jarvis S, Zamponi G. Functional roles of cytoplasmic loops and pore lining  
647 transmembrane helices in the voltage-dependent inactivation of HVA calcium channels. Journal of  
648 Physiology. 2003;554.2:263-73.
- 649 16. Zhang J, Ellinor T, Aldrich R, Tsien R. Molecular determinants of voltage-dependent inactivation  
650 in calcium channels. Letters to Nature. 1994;372:4.
- 651 17. Dick I, Joshi-Mukherjee R, Yang W, Yue D. Arrhythmogenesis in Timothy Syndrome is associated  
652 with defects in Ca<sup>2+</sup>-dependent inactivation. Nature Communications. 2016;7. doi:  
653 10.1038/ncomms1037.
- 654 18. Hoffman E. Voltage-Gated Ion Channelopathies: Inherited Disorders Caused by Abnormal  
655 Sodium, Chloride, and Calcium Regulation in Skeletal Muscle. Annual Reviews Medicine. 1995;46:10.
- 656 19. Noble D, Tsien R. Reconstruction of the Repolarization Process in Cardiac Purkinje Fibres Based  
657 on Voltage Clamp Measurements of Membrane Current. Journal of Physiology. 1969;200:22.
- 658 20. Deal KK, England SK, Tamkun MM. Molecular Physiology and Cardiac Potassium Channels.  
659 Physiological Reviews. 1996;76(1):49-67.
- 660 21. Lei M, Brown H. Two Components of the Delayed Rectifier Potassium Current, I<sub>K</sub>, in Rabbit Sino-  
661 Atrial Node Cells. Experimental Physiology. 1996;81:16.

- 662 22. Barro-Soria R, Rebolledo S, Liin SI, Perez ME, Sampson KJ, Kass RS, Larsson HP. KCNE1 divides the  
663 voltage sensor movement in KCNQ1/KCNE1 channels into two steps. *Nature Communications*.  
664 2014;5:3750. doi: 10.1038/ncomms4750
- 665 <https://www.nature.com/articles/ncomms4750#supplementary-information>.
- 666 23. Osteen J, Gonzalez C, Sampson K, Iyer V, Rebolledo S, Larsson H, Kass R. KCNE1 alters the  
667 voltage sensor movements necessary to open the KCNQ1 channel gate. *Proceedings of the National*  
668 *Academy of Sciences*. 2010;107:6.
- 669 24. Huang H, Kuenze G, Smith J, Vanoye, CG., George Jr., AL., Meiler, J., Sanders, CR., Taylor K,  
670 Duran A, Hadziselimovic A, Meiler J, Vanoye C, George A, Sanders C. Mechanisms of KCNQ1 channel  
671 dysfunction in long QT syndrome involving voltage sensor domain mutations. *Science Advances*.  
672 2018;4:13.
- 673 25. Ma D, Wei H, Lu J, Huang D, Liu Z, Loh L, Islam O, Liew R, Shim W, Cook S. Characterization of a  
674 novel KCNQ1 mutation for type 1 long QT syndrome and assessment of therapeutic potential of a novel  
675 IKs activator using patient-specific induced pluripotent stem cell-derived cardiomyocytes. *Stem Cell*  
676 *Research and Therapy*. 2015;6:1-13.
- 677 26. Schwartz P, Crotti L, Insolia R. Long QT Syndrome: From Genetics to Management. *Circulation:*  
678 *Arrhythmia and Electrophysiology*. 2012;5(4):9.
- 679 27. Sanguinetti M. Dysfunction of Delayed Rectifier Potassium Channels in an Inherited Cardiac  
680 Arrhythmia. *Annals of the New York Academy of Sciences*. 1999;868:406-12. doi: 10.1111/j.1749-  
681 6632.1999.tb11302.x.
- 682 28. Harmer S, Wilson A, Aldridge R, Tinker A. Mechanisms of disease pathogenesis in long QT  
683 syndrome type 5. *American Journal of Cell Physiology*. 2009;298:C263-C73.
- 684 29. Endo J, Arita M. Cardioprotective mechanism of omega-3 polyunsaturated fatty acids. *Journal of*  
685 *Cardiology*. 2016;67:5.
- 686 30. Kang J, Leaf A. Prevention of fatal cardiac arrhythmias by polyunsaturated fatty acids. *The*  
687 *American Journal of Clinical Nutrition*. 2000;71:6.
- 688 31. Benatti P, Peluso G, Nicolai R, Calvani M. Polyunsaturated Fatty Acids: Biochemical, Nutritional,  
689 and Epigenetic Properties. *Journal of the American College of Nutrition*. 2004;23:281-302.
- 690 32. Kang J, Leaf A. Evidence that free polyunsaturated fatty acids modify Na<sup>+</sup> channels by directly  
691 binding to the channel proteins. *Proceedings of the National Academy of Sciences*. 1996;93:3542-6.
- 692 33. Xiao Y, Gomez, AM., Morgan, JP., Lederer, WJ., Leaf, A. Suppression of voltage-gated L-type Ca<sup>2+</sup>  
693 currents by polyunsaturated fatty acids in adult and neonatal rat ventricular myocytes. *Proceedings of*  
694 *the National Academy of Sciences*. 1997;94:6.
- 695 34. Xiao YF, Kang JX, Morgan JP, Leaf A. Blocking effects of polyunsaturated fatty acids on Na<sup>+</sup>  
696 channels of neonatal rat cardiomyocytes. *Proceedings of the National Academy of Sciences*.  
697 1995;92:11000-4.
- 698 35. Xiao Y, Qingen K, Wang S, Auktor K, Yang Y, Wang G, Morgan J, Leaf A. Single point mutations  
699 affect fatty acid block of human myocardial sodium channel a subunit Na<sup>+</sup> channels. *Proceedings of the*  
700 *National Academy of Sciences*. 2001;98(6):6.
- 701 36. Borjesson S, Hammarstrom S, Elinder F. Lipoelectric Modification of Ion Channel Voltage Gating  
702 by Polyunsaturated Fatty Acids. *Biophysical Journal*. 2008;95:11.
- 703 37. Liin S, Ejneby M, Barro-Soria R, MA. S, Larsson J, Harlin F, Parkkari T, Bentzen B, Schmitt N,  
704 Larsson H, Elinder F. Polyunsaturated fatty acid analogs act antiarrhythmically on the cardiac I<sub>Ks</sub> channel.  
705 *Proceedings of the National Academy of Sciences*. 2015;112(18):6.
- 706 38. Liin S, Larsson J, Barro-Soria R, Bentzen B, Larsson H. Fatty acid analogue N-arachidonoyl taurine  
707 restores function of I<sub>Ks</sub> channels with diverse long QT mutations. *eLIFE*. 2016. doi:  
708 [dx.doi.org/10.7554/eLife.20272](https://doi.org/10.7554/eLife.20272).

- 709 39. Liin S, Yazdi S, Ramentol R, Barro-Soria R, Larsson H. Mechanisms Underlying the Dual Effect of  
710 Polyunsaturated Fatty Acid Analogs on Kv7.1. *Cell Reports*. 2018;24:2908-18. doi:  
711 [doi.org/10.1016/j.celrep.2018.08.031](https://doi.org/10.1016/j.celrep.2018.08.031).
- 712 40. O'Hara T, Virag L, Varro A, Rudy Y. Simulation of the Undiseased Human Cardiac Ventricular  
713 Action Potential: Model Formulation and Experimental Validation. *PLOS Computational Biology*.  
714 2011;7(5):29. doi: [doi:10.1371/journal.pcbi.1002061](https://doi.org/10.1371/journal.pcbi.1002061).
- 715 41. Larsson J, Larsson H, Liin S. KCNE1 tunes the sensitivity of Kv7.1 to polyunsaturated fatty acids  
716 by moving turret residues close to the binding site. *eLIFE*. 2018. doi: [doi.org/10.7554/eLife.37257](https://doi.org/10.7554/eLife.37257).
- 717 42. Borjesson S, Elinder F. An electrostatic potassium channel opener targeting the final voltage  
718 sensor transition. *Journal of General Physiology*. 2011;137:563-77. doi: DOI: 10.1085/jgp.201110599.
- 719 43. Ahern C, Payandeh J, Bosmans F, Chanda B. The hitchhiker's guide to the voltage-gated sodium  
720 channel galaxy. *Journal of General Physiology*. 2015;147:1-24. doi: DOI: 10.1085/jgp.201511492.
- 721 44. Hsu E, Zhu W, Schubert A, Voelker T, Varga Z, Silva J. Regulation of Na<sup>+</sup> channel inactivation by  
722 the DIII and DIV voltage-sensing domains. *Journal of General Physiology*. 2017;149:389-403. doi:  
723 [doi.org/10.1085/jgp.201611678](https://doi.org/10.1085/jgp.201611678).
- 724 45. Nguyen P, DeMarco K, Vorobyov I, Clancy C, Yarov-Yarovoy V. Structural basis for antiarrhythmic  
725 drug interactions with the human cardiac sodium channel. *Proceedings of the National Academy of  
726 Sciences*. 2019;116:2945-54. doi: [doi.org/10.1073/pnas.1817446116](https://doi.org/10.1073/pnas.1817446116).
- 727 46. Tang L, Gamal El-Din T, Swanson T, Pryde D, Scheuer T, Zheng N, Catterall W. Structural basis for  
728 inhibition of a voltage-gated Ca<sup>2+</sup> channel by Ca<sup>2+</sup> antagonist drugs. *Nature Letters*. 2016;537:16.
- 729 47. Pepe S, Bogdanov K, Hallaq H, Spurgeon H, Leaf A, Lakatta E. ω3 polyunsaturated fatty acid  
730 modulates dihydropyridine effects on L-type Ca<sup>2+</sup> channels, cytosolic Ca<sup>2+</sup>, and contraction in adult rat  
731 cardiac myocytes. *Proceedings of the National Academy of Sciences*. 1994;91:8832-6.
- 732 48. Liin S, Lund P, Larsson J, Brask J, Wallner B, Elinder F. Biaryl sulfonamide motifs up- or down-  
733 regulate ion channel activity by activating voltage sensors. *Journal of General Physiology*.  
734 2018;150:1215-30. doi: DOI: 10.1085/jgp.201711942.
- 735 49. Ahuja S, Mukund S, Deng L, Khakh K, Chang E, Ho H, Shriver S, Young C, Lin S, Johnson Jr. J, Wu  
736 P, Li J, Coons M, Tam C, Brillantes B, Sampang H, Mortara K, Bowman K, Clark K, Estevez A, Xie Z,  
737 Verschoof H, Grimwood M, Dehnhardt C, Andrez J, Focken T, Sutherlin D, Safina B, Starovasnik M,  
738 Ortwine D, Franke Y, Cohen C, Hackos D, Koth C, Payandeh J. Structural basis of Nav1.7 inhibition by an  
739 isoform-selective small-molecule antagonist. *Science*. 2015;350(6267):1491-502.

740

741



**Table 1: Summary of PUFA effects on current and apparent affinity**

| <b>PUFA</b>             | <b>I<sub>Ks</sub> I/I<sub>0</sub> (at 7 μM)<br/>(mean ± SEM)</b> | <b>K<sub>m</sub> I<sub>Ks</sub> (μM)<br/>(mean ± SEM)</b> | <b>I<sub>Ca</sub> I/I<sub>0</sub> (at 7 μM)<br/>(mean ± SEM)</b> | <b>K<sub>m</sub> I<sub>Ca</sub> (μM)<br/>(mean ± SEM)</b> | <b>I<sub>Na</sub> I/I<sub>0</sub> (at 7 μM)<br/>(mean ± SEM)</b> | <b>K<sub>m</sub> I<sub>Na</sub> (μM)<br/>(mean ± SEM)</b> |
|-------------------------|------------------------------------------------------------------|-----------------------------------------------------------|------------------------------------------------------------------|-----------------------------------------------------------|------------------------------------------------------------------|-----------------------------------------------------------|
| <b>N-AT</b>             | 1.12 ± 0.1<br>(p = 0.27)                                         | 9.8 ± 3.3                                                 | 0.5 ± 0.1<br>(p = 0.04)                                          | 3.4 ± 2.5                                                 | 0.2 ± 0.01<br>(p = 0.001)                                        | 3.1 ± 0.3                                                 |
| <b>Lin-<br/>taurine</b> | 7.7 ± 2.9<br>(p = 0.14)                                          | 11.4 ± 0.4                                                | 0.3 ± 0.1<br>(p = 0.02)                                          | 0.1 ± 0.01                                                | 0.1 ± 0.02<br>(p = 0.0001)                                       | 2.4 ± 0.04                                                |
| <b>Pin-<br/>taurine</b> | 6.8 ± 1.0<br>(p = 0.01)                                          | 4.5 ± 0.2                                                 | 0.7 ± 0.1<br>(p = 0.02)                                          | NA                                                        | 0.5 ± 0.1<br>(p = 0.01)                                          | 5.8 ± 1.7                                                 |
| <b>DHA-<br/>taurine</b> | 5.1 ± 0.7<br>(p = 0.03)                                          | 5.9 ± 0.3                                                 | 0.3 ± 0.05<br>(p = 0.02)                                         | 0.9 ± 0.6                                                 | 0.07 ± 0.01<br>(p = 0.0001)                                      | 2.3 ± 0.1                                                 |
| <b>Lin-<br/>glycine</b> | 5.1 ± 0.4<br>(p = 0.002)                                         | 5.4 ± 0.2                                                 | 0.4 ± 0.2<br>(p = 0.07)                                          | 2.2 ± 0.5                                                 | 0.5 ± 0.1<br>(p = 0.02)                                          | 5.6 ± 0.5                                                 |
| <b>Pin-<br/>glycine</b> | 2.5 ± 0.2<br>(p = 0.02)                                          | 3.8 ± 0.4                                                 | 0.8 ± 0.1<br>(p = 0.26)                                          | NA                                                        | 0.7 ± 0.1<br>(p = 0.09)                                          | 7.1 ± 1.2                                                 |
| <b>DHA-<br/>glycine</b> | 3.7 ± 1.0<br>(p = 0.07)                                          | 9.4 ± 0.5                                                 | 0.9 ± 0.1<br>(p = 0.19)                                          | 0.9 ± 0.03                                                | 1.1 ± 0.05<br>(p = 0.24)                                         | 16.7 ± 0.1                                                |

I/I<sub>0</sub> represents the relative current of the specified channel. The K<sub>m</sub> indicates the concentration at which half the maximal effect on I/I<sub>0</sub> occurs and is used as a measure of the apparent affinity of the PUFA analogue. Data is represented at the mean ± SEM. Comparisons were made using One-way ANOVA and Student's t test. Significance level is set to p = 0.05.

743 **Figures and Figure Legends**

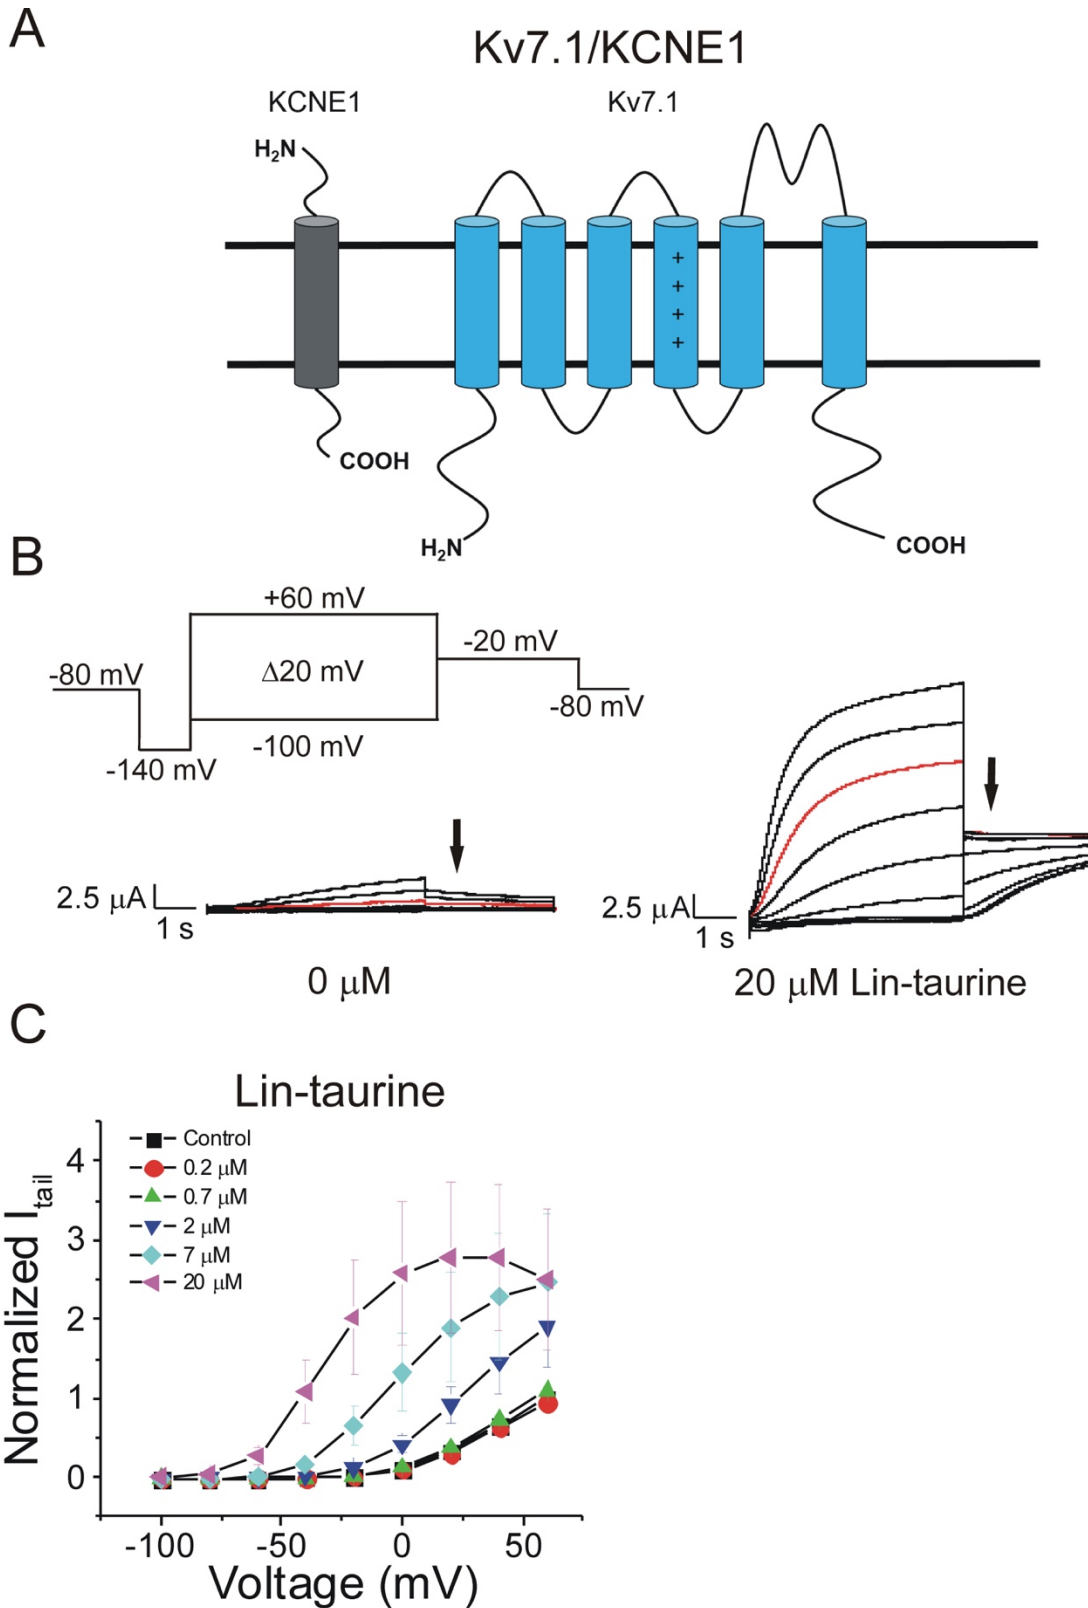

744

745

746 **Figure 1: PUFAs activate Kv7.1/KCNE1 channels through an electrostatic**  
747 **mechanism on voltage sensor and pore. A)** Simplified membrane topology of a  
748 single Kv7.1  $\alpha$ -subunit (blue) and a single KCNE1  $\beta$ -subunit (grey). **B)** Voltage protocol  
749 used to measure voltage dependence of activation and representative Kv7.1/KCNE1  
750 current traces in control (0  $\mu$ M) and 20  $\mu$ M Lin-aurine. Arrows mark tail currents. **C)**  
751 Current-voltage relationship demonstrating PUFA induced left-shift in the voltage-  
752 dependence of activation ( $V_{0.5}$ ) and increase in maximal conductance ( $G_{max}$ ) (mean  $\pm$   
753 SEM; n = 3).  
754

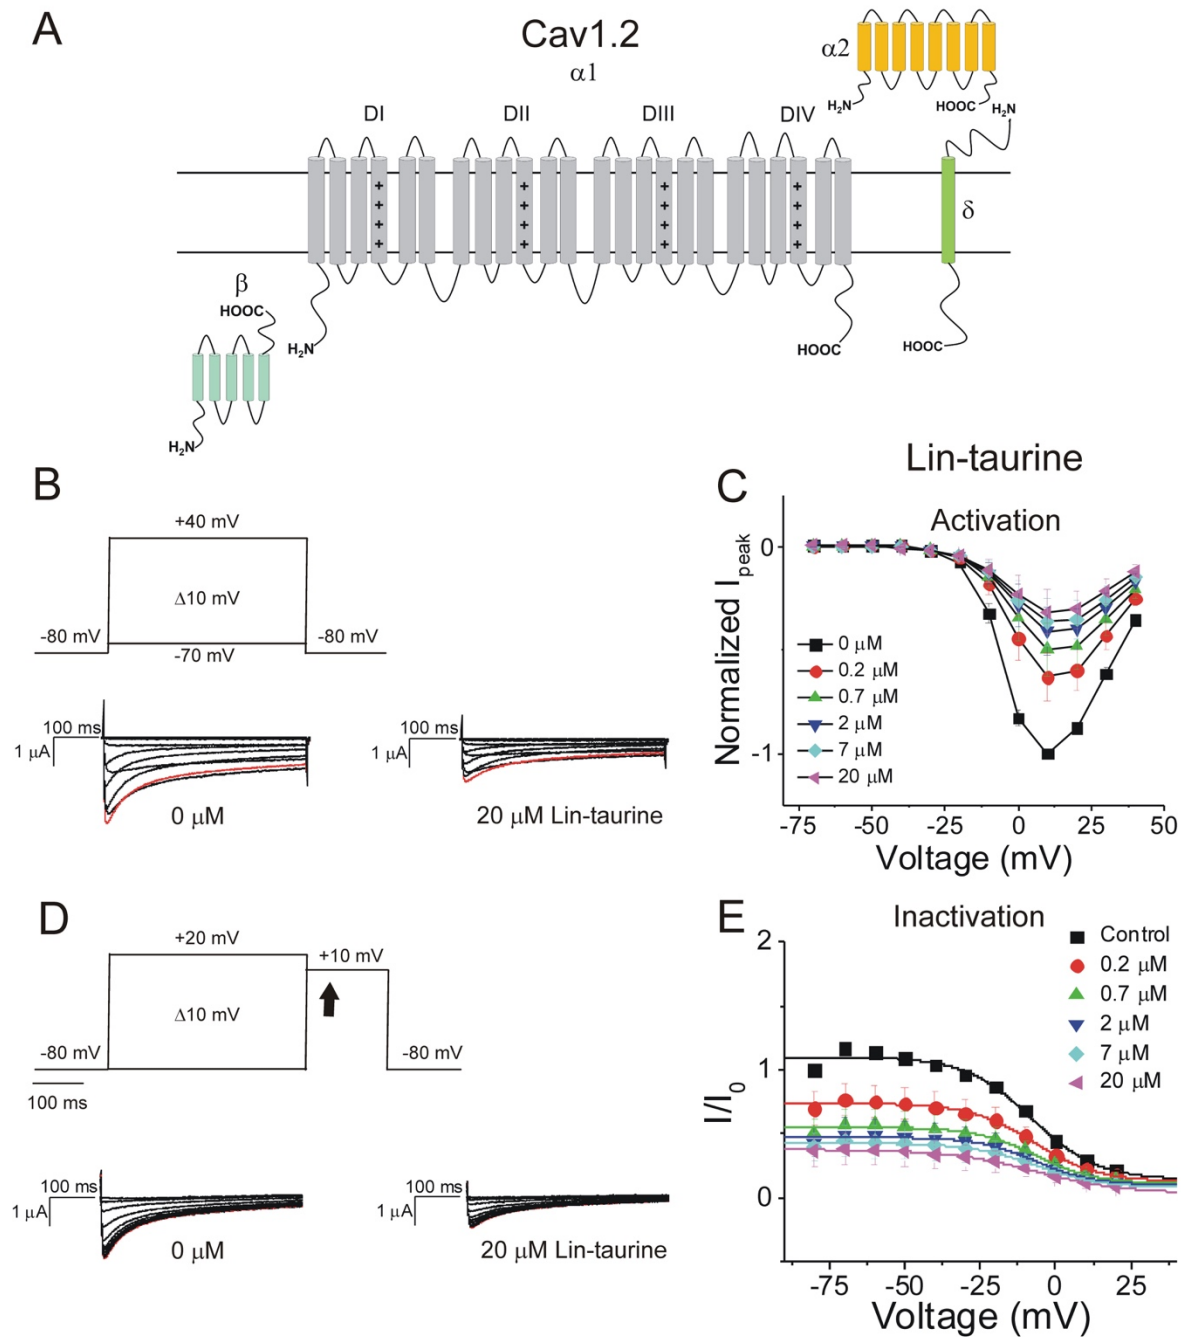

755

756 **Figure 2: PUFAs inhibit Cav1.2 channels without altering channel voltage**  
757 **dependence. A)** Simplified membrane topology of the Cav1.2 pore-forming  $\alpha$ -subunit  
758 (light gray) and auxiliary  $\beta$ - (mint) and  $\alpha 2\delta$ -subunits (yellow and green). **B)** Voltage  
759 protocol used to measure voltage dependence of activation and representative Cav1.2  
760 current traces in control (0  $\mu$ M) and 20  $\mu$ M Lin-aurine. **C)** Current-voltage relationship  
761 demonstrating dose-dependent inhibition of Cav1.2 currents measured from activation  
762 protocol (mean  $\pm$  SEM; n = 3). **D)** Voltage protocol used to measure voltage  
763 dependence of inactivation and representative Cav1.2 current traces in control (0  $\mu$ M)  
764 and 20  $\mu$ M Lin-aurine measured at arrow. **E)** Current-voltage relationship  
765 demonstrating dose-dependent inhibition of Cav1.2 currents measured from inactivation  
766 protocol (mean  $\pm$  SEM; n = 3).

767

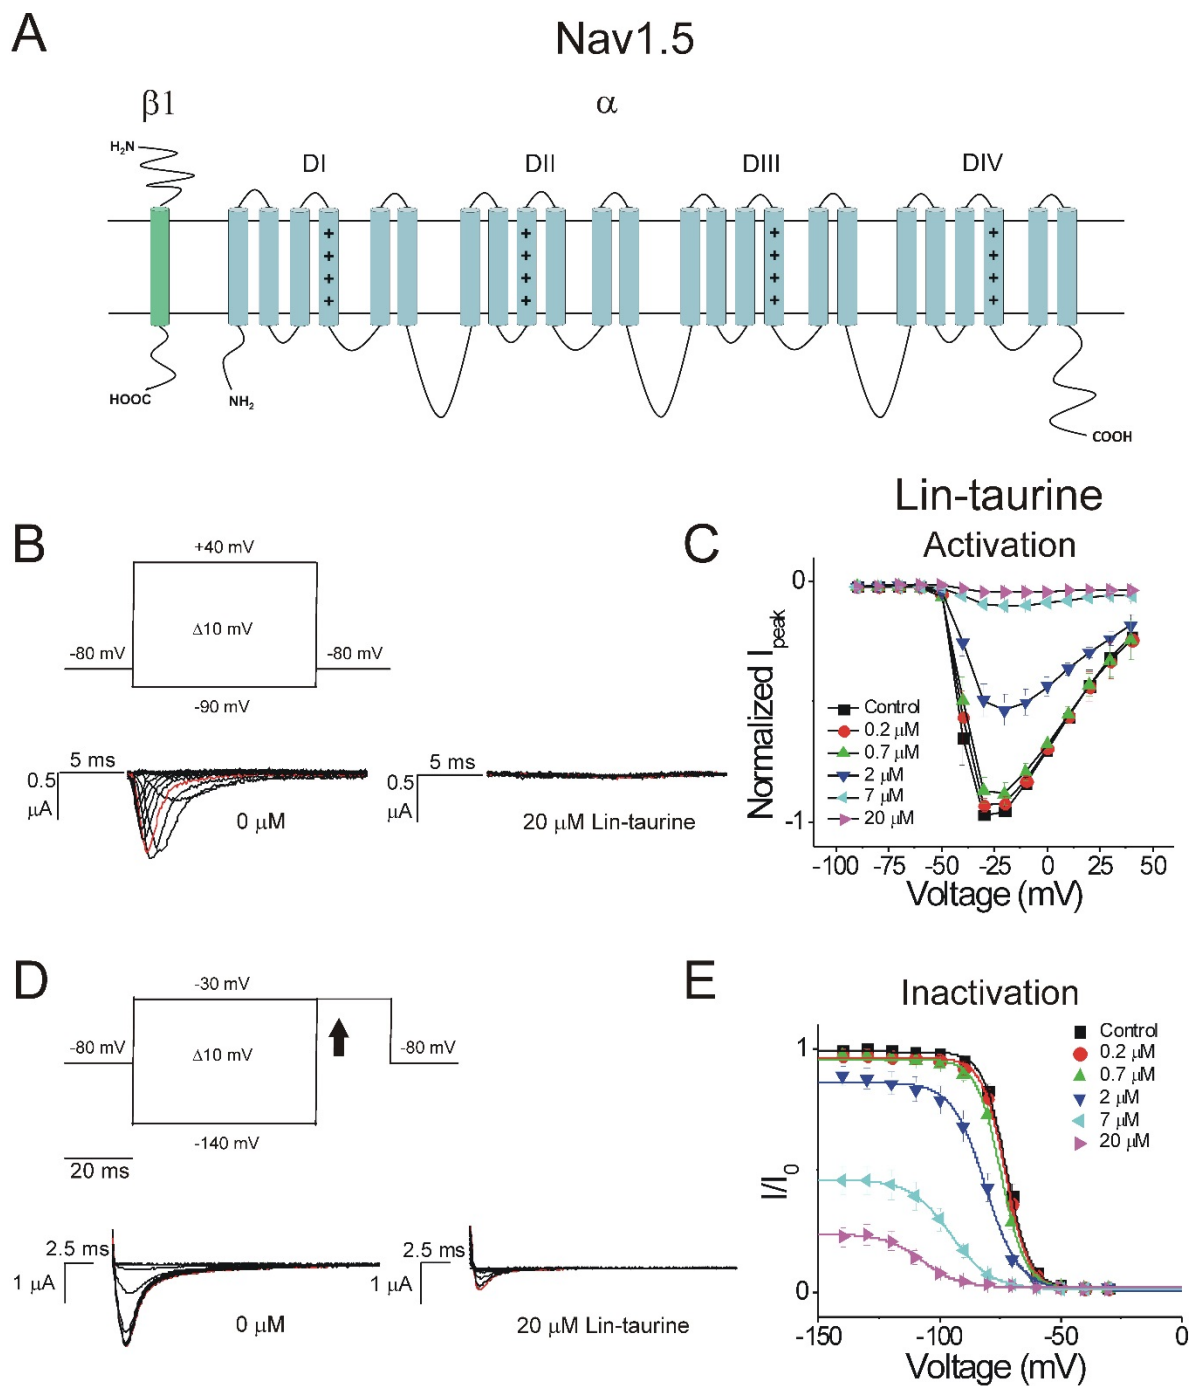

769 **Figure 3: PUFAs inhibit Nav1.5 by shifting the voltage dependence of inactivation.**

770 **A)** Simplified membrane topology of the Nav1.5 pore-forming  $\alpha$ -subunit (light blue) and  
771 auxiliary  $\beta$ -subunit (green). **B)** Voltage protocol used to measure voltage dependence of  
772 activation and representative Nav1.5 current traces in control (0  $\mu$ M) and 20  $\mu$ M Lin-  
773 taurine. **C)** Current-voltage relationship demonstrating dose-dependent inhibition of  
774 Nav1.5 currents measured from activation protocol (mean  $\pm$  SEM; n = 5). **D)** Voltage  
775 protocol used to measure voltage dependence of inactivation and representative Nav1.5  
776 current traces in control (0  $\mu$ M) and 20  $\mu$ M Lin-aurine measured at arrow. **E)** Current-  
777 voltage relationship demonstrating dose-dependent inhibition of Nav1.5 currents and  
778 leftward shift in the voltage dependence of inactivation measured from inactivation  
779 protocol (mean  $\pm$  SEM; n = 5).

780

**A**

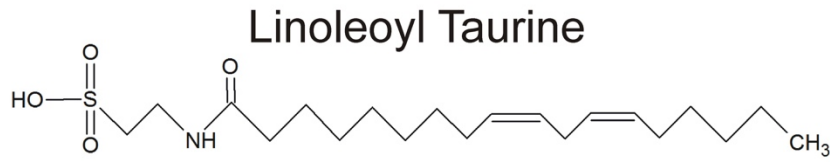

**Kv7.1/KCNE1**

**B**

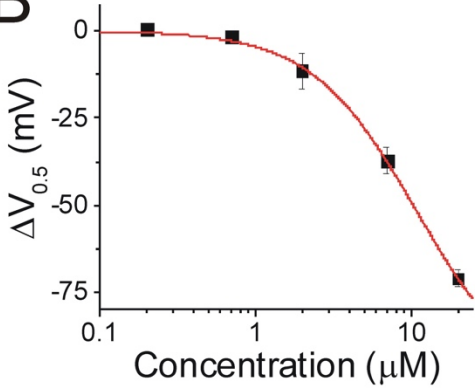

**C**

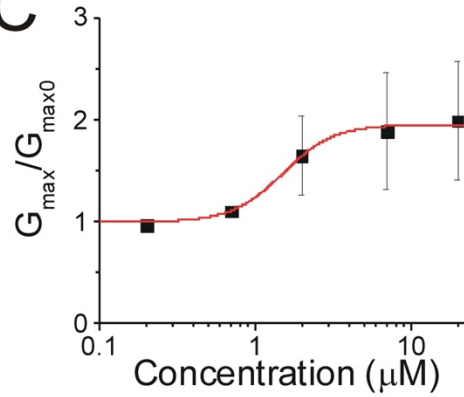

**Cav1.2**

**D**

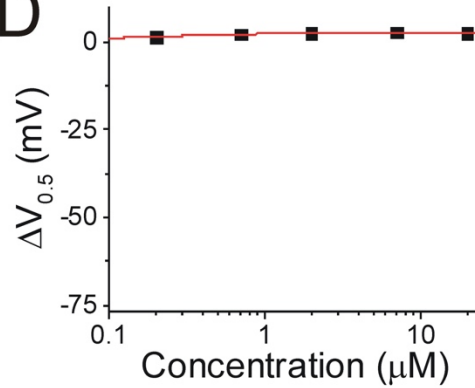

**E**

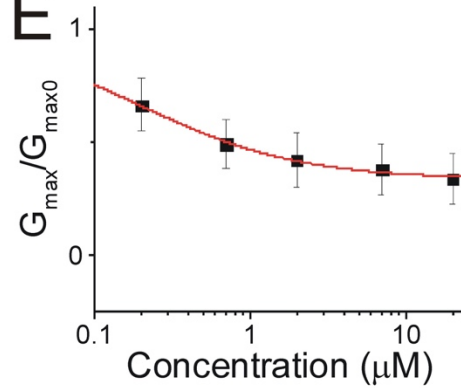

**Nav1.5**

**F**

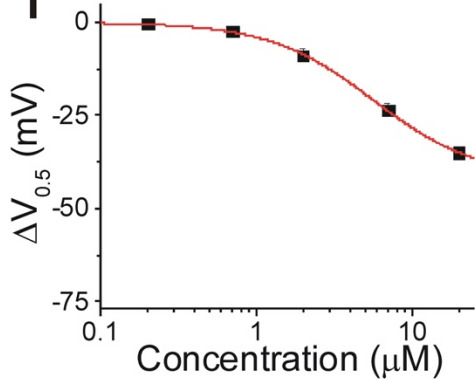

**G**

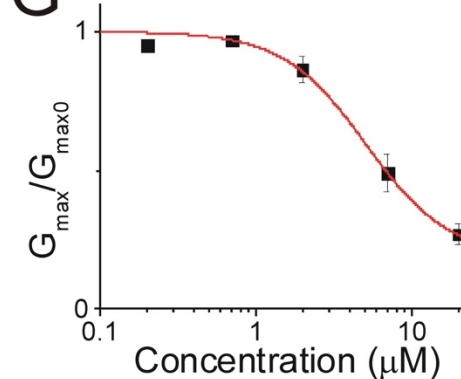



782 **Figure 4: Linoleoyl taurine has broad selectivity for Kv7.1/KCNE1, Cav1.2, and**  
783 **Nav1.5. A)** Structure of Linoleoyl taurine (Lin-*taurine*). **B, D, F)** Dose response of the  
784 shift in voltage dependent **B)** activation ( $\Delta V_{0.5}$ ) of Kv7.1/KCNE1 channels (mean  $\pm$  SEM;  
785 n = 3), **D)** inactivation ( $\Delta V_{0.5}$ ) of Cav1.2 channels (mean  $\pm$  SEM; n = 3), **F)** inactivation  
786 ( $\Delta V_{0.5}$ ) of Nav1.5 channels (mean  $\pm$  SEM; n = 5) in the presence of lin-*taurine*. **C, E, G)**  
787 Dose response of the change in maximal conductance ( $G_{max}$ ) of **C)** Kv7.1/KCNE1  
788 channels **E)** Cav1.2 channels, **G)** Nav1.5 channels in the presence of lin-*taurine*.  
789  
790



792 **Figure 5: N-arachidonoyl taurine is more selective for Cav1.2 and Nav1.5 than for**  
793 **Kv7.1/KCNE1. A)** Structure of N-arachidonoyl taurine (N-AT). **B)** Current-voltage  
794 relationship of N-AT on Kv7.1/KCNE1 channels (mean  $\pm$  SEM; n = 5). **C)** Dose  
795 response of the shift in voltage dependent activation ( $\Delta V_{0.5}$ ) of Kv7.1/KCNE1 channels  
796 in the presence of N-AT. **D)** Dose response of the change in maximal conductance  
797 ( $G_{max}$ ) of Kv7.1/KCNE1 channels in the presence of N-AT. **E)** Current-voltage  
798 relationship of N-AT on Cav1.2 channels (mean  $\pm$  SEM; n = 4). **F)** Dose response of the  
799 shift in voltage dependent inactivation ( $\Delta V_{0.5}$ ) of Cav1.2 channels in the presence of N-  
800 AT. **G)** Dose response of the change in maximal conductance ( $G_{max}$ ) of Cav1.2  
801 channels in the presence of N-AT. **H)** Current-voltage relationship of N-AT on Nav1.5  
802 channels (mean  $\pm$  SEM; n = 3). **I)** Dose response of the shift in voltage dependent  
803 inactivation ( $\Delta V_{0.5}$ ) of Nav1.5 channels in the presence of N-AT. **J)** Dose response of  
804 the change in maximal conductance ( $G_{max}$ ) of Nav1.5 channels in the presence of N-AT.



806 **Figure 6: Pinoleoyl taurine has broad selectivity for Kv7.1/KCNE1, Cav1.2, and**  
807 **Nav1.5. A)** Structure of Pinoleoyl taurine (Pin-aurine). **B)** Current-voltage relationship  
808 of pin-aurine on Kv7.1/KCNE1 channels (mean  $\pm$  SEM; n = 4). **C)** Dose response of the  
809 shift in voltage dependent activation ( $\Delta V_{0.5}$ ) of Kv7.1/KCNE1 channels in the presence  
810 of pin-aurine. **D)** Dose response of the change in maximal conductance ( $G_{max}$ ) of  
811 Kv7.1/KCNE1 channels in the presence of pin-aurine. **E)** Current-voltage relationship of  
812 pin-aurine on Cav1.2 channels (mean  $\pm$  SEM; n = 5). **F)** Dose response of the shift in  
813 voltage dependent inactivation ( $\Delta V_{0.5}$ ) of Cav1.2 channels in the presence of pin-  
814 taurine. **G)** Dose response of the change in maximal conductance ( $G_{max}$ ) of Cav1.2  
815 channels in the presence of pin-aurine. **H)** Current-voltage relationship of pin-aurine on  
816 Nav1.5 channels (mean  $\pm$  SEM; n = 4). **I)** Dose response of the shift in voltage  
817 dependent inactivation ( $\Delta V_{0.5}$ ) of Nav1.5 channels in the presence of pin-aurine. **J)**  
818 Dose response of the change in maximal conductance ( $G_{max}$ ) of Nav1.5 channels in the  
819 presence of pin-aurine.

820

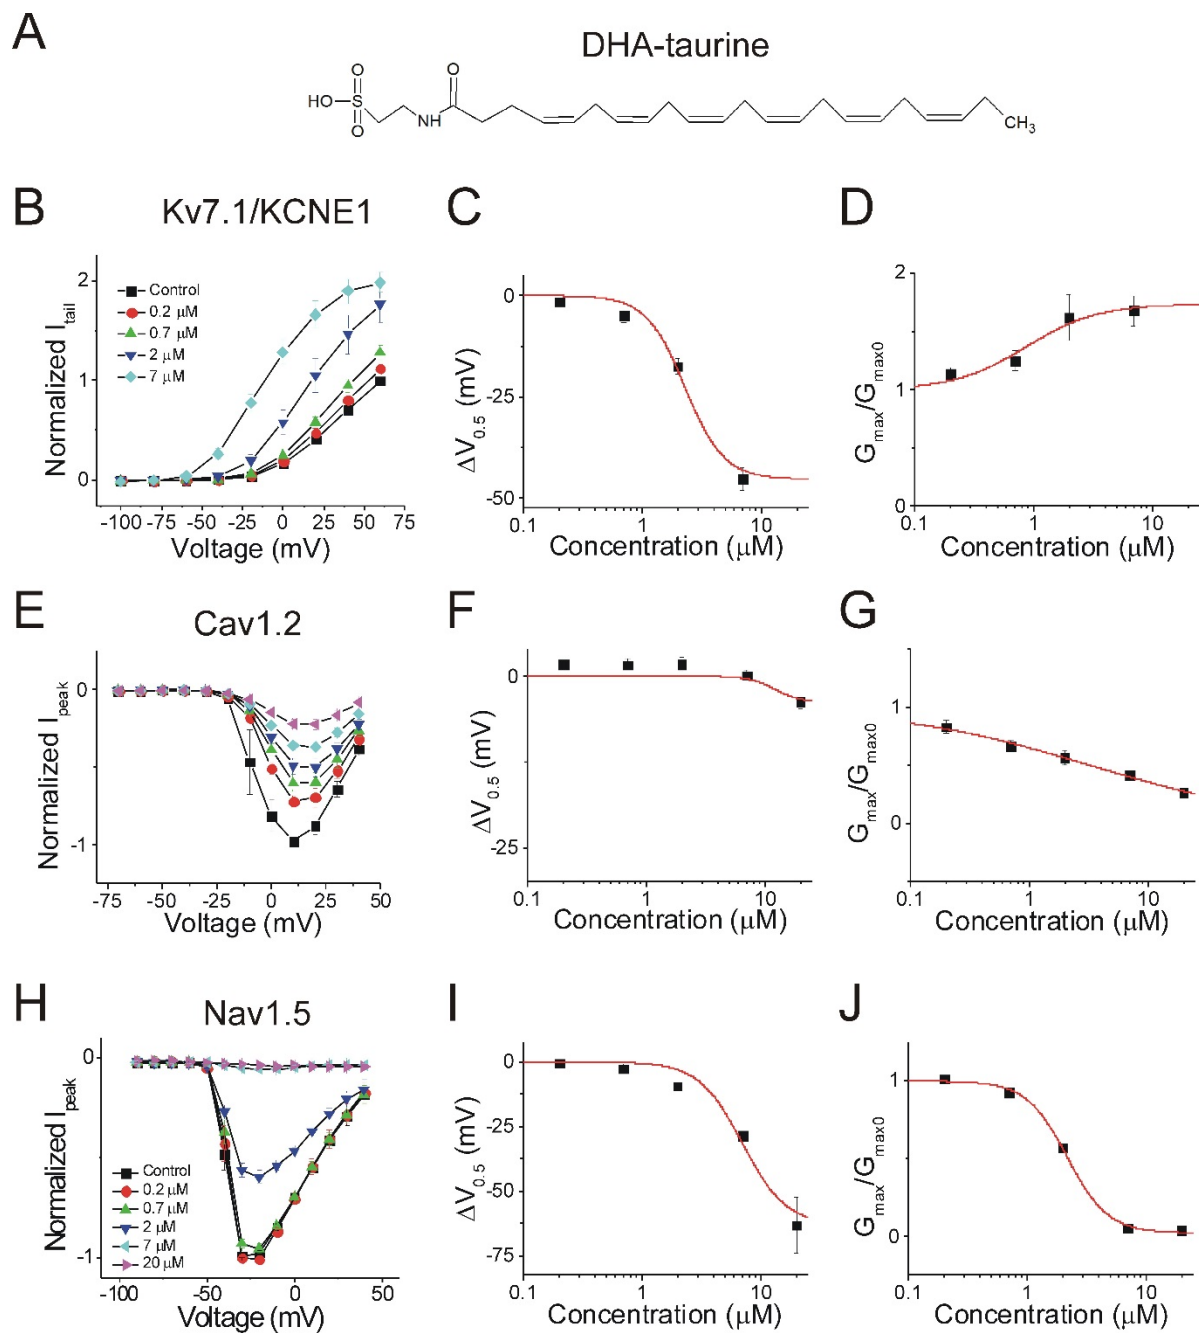

821

822 **Figure 7: Docosahexanoyl-aurine has broad selectivity for Kv7.1/KCNE1, Cav1.2,**  
823 **and Nav1.5. A)** Structure of docosahexanoyl taurine (DHA-aurine). **B)** Current-voltage  
824 relationship of DHA-aurine on Kv7.1/KCNE1 channels (mean  $\pm$  SEM; n = 3). **C)** Dose  
825 response of the shift in voltage dependent activation ( $\Delta V_{0.5}$ ) of Kv7.1/KCNE1 channels  
826 in the presence of DHA-aurine. **D)** Dose response of the change in maximal  
827 conductance ( $G_{max}$ ) of Kv7.1/KCNE1 channels in the presence of DHA-aurine. **E)**  
828 Current-voltage relationship of DHA-aurine on Cav1.2 channels (mean  $\pm$  SEM; n = 3).  
829 **F)** Dose response of the shift in voltage dependent inactivation ( $\Delta V_{0.5}$ ) of Cav1.2  
830 channels in the presence of DHA-aurine. **G)** Dose response of the change in maximal  
831 conductance ( $G_{max}$ ) of Cav1.2 channels in the presence of DHA-aurine. **H)** Current-  
832 voltage relationship of DHA-aurine on Nav1.5 channels (mean  $\pm$  SEM; n = 3). **I)** Dose  
833 response of the shift in voltage dependent inactivation ( $\Delta V_{0.5}$ ) of Nav1.5 channels in the  
834 presence of DHA-aurine. **J)** Dose response of the change in maximal conductance  
835 ( $G_{max}$ ) of Nav1.5 channels in the presence of DHA-aurine.

836





838 **Figure 8: Linoleoyl glycine has broad selectivity for Kv7.1/KCNE1, Cav1.2, and**  
839 **Nav1.5. A)** Structure of Linoleoyl glycine (Lin-glycine). **B)** Current-voltage relationship of  
840 lin-glycine on Kv7.1/KCNE1 channels (mean  $\pm$  SEM; n = 4). **C)** Dose response of the  
841 shift in voltage dependent activation ( $\Delta V_{0.5}$ ) of Kv7.1/KCNE1 channels in the presence  
842 of lin-glycine. **D)** Dose response of the change in maximal conductance ( $G_{max}$ ) of  
843 Kv7.1/KCNE1 channels in the presence of Lin-glycine. **E)** Current-voltage relationship of  
844 lin-glycine on Cav1.2 channels (mean  $\pm$  SEM; n = 4). **F)** Dose response of the shift in  
845 voltage dependent inactivation ( $\Delta V_{0.5}$ ) of Cav1.2 channels in the presence of lin-glycine.  
846 **G)** Dose response of the change in maximal conductance ( $G_{max}$ ) of Cav1.2 channels in  
847 the presence of lin-glycine. **H)** Current-voltage relationship of Lin-glycine on Nav1.5  
848 channels (mean  $\pm$  SEM; n = 4). **I)** Dose response of the shift in voltage dependent  
849 inactivation ( $\Delta V_{0.5}$ ) of Nav1.5 channels in the presence of lin-glycine. **J)** Dose response  
850 of the change in maximal conductance ( $G_{max}$ ) of Nav1.5 channels in the presence of lin-  
851 glycine.

852

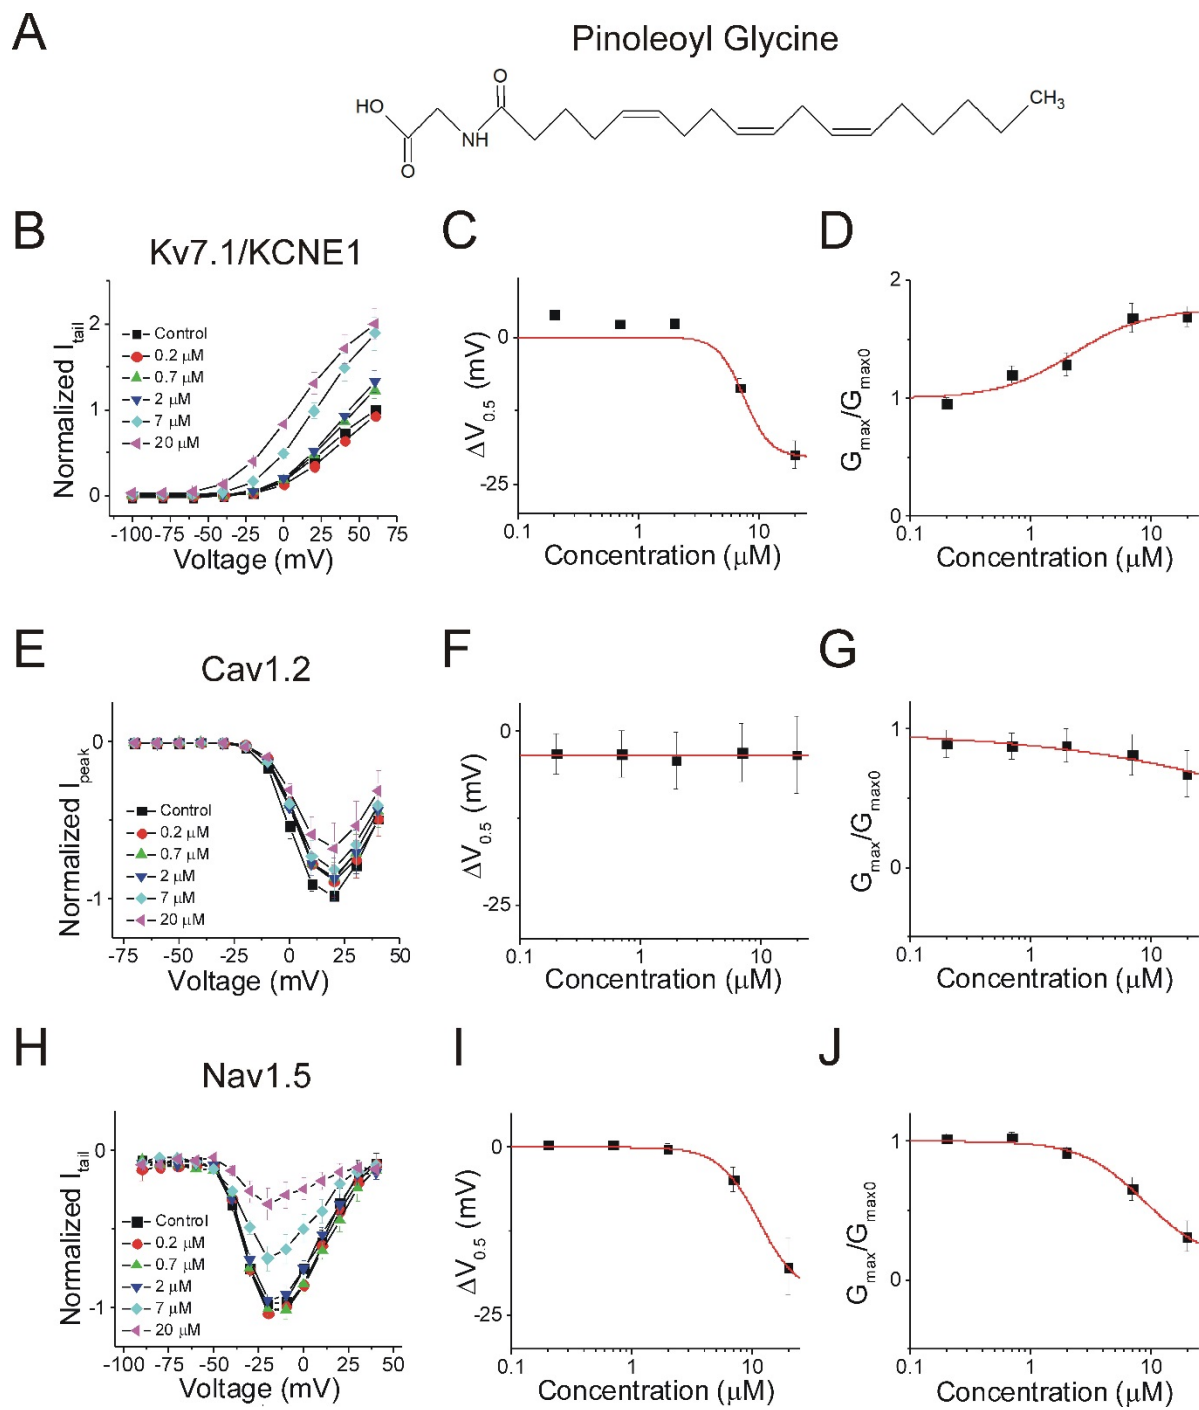

853

854 **Figure 9: Pinoleoyl glycine is more selective for Kv7.1/KCNE1 and Nav1.5**  
855 **channels than for Cav1.2. A)** Structure of Pinoleoyl glycine (Pin-glycine). **B)** Current-  
856 voltage relationship of pin-glycine on Kv7.1/KCNE1 channels (mean  $\pm$  SEM; n = 3). **C)**  
857 Dose response of the shift in voltage dependent activation ( $\Delta V_{0.5}$ ) of Kv7.1/KCNE1  
858 channels in the presence of pin-glycine. **D)** Dose response of the change in maximal  
859 conductance ( $G_{max}$ ) of Kv7.1/KCNE1 channels in the presence of Pin-glycine. **E)**  
860 Current-voltage relationship of pin-glycine on Cav1.2 channels (mean  $\pm$  SEM; n = 3). **F)**  
861 Dose response of the shift in voltage dependent inactivation ( $\Delta V_{0.5}$ ) of Cav1.2 channels  
862 in the presence of pin-glycine. **G)** Dose response of the change in maximal  
863 conductance ( $G_{max}$ ) of Cav1.2 channels in the presence of Pin-glycine. **H)** Current-  
864 voltage relationship of pin-glycine on Nav1.5 channels (mean  $\pm$  SEM; n = 4). **I)** Dose  
865 response of the shift in voltage dependent inactivation ( $\Delta V_{0.5}$ ) of Nav1.5 channels in the  
866 presence of pin-glycine. **J)** Dose response of the change in maximal conductance  
867 ( $G_{max}$ ) of Nav1.5 channels in the presence of pin-glycine.

868



870 **Figure 10: Docosahexanoyl glycine is more selective for Kv7.1/KCNE1 channels.**  
871 **A)** Structure of docosahexanoyl glycine (DHA-glycine). **B)** Current-voltage relationship  
872 of DHA-glycine on Kv7.1/KCNE1 channels (mean  $\pm$  SEM; n = 4). **C)** Dose response of  
873 the shift in voltage dependent activation ( $\Delta V_{0.5}$ ) of Kv7.1/KCNE1 channels in the  
874 presence of DHA-glycine. **D)** Dose response of the change in maximal conductance  
875 ( $G_{max}$ ) of Kv7.1/KCNE1 channels in the presence of DHA-glycine. **E)** Current-voltage  
876 relationship of DHA-glycine on Cav1.2 channels (mean  $\pm$  SEM; n = 3). **F)** Dose  
877 response of the shift in voltage dependent inactivation ( $\Delta V_{0.5}$ ) of Cav1.2 channels in the  
878 presence of DHA-glycine. **G)** Dose response of the change in maximal conductance  
879 ( $G_{max}$ ) of Cav1.2 channels in the presence of DHA-glycine. **H)** Current-voltage  
880 relationship of DHA-glycine on Nav1.5 channels (mean  $\pm$  SEM; n = 7). **I)** Dose response  
881 of the shift in voltage dependent inactivation ( $\Delta V_{0.5}$ ) of Nav1.5 channels in the presence  
882 of DHA-glycine. **J)** Dose response of the change in maximal conductance ( $G_{max}$ ) of  
883 Nav1.5 channels in the presence of DHA-glycine.

884

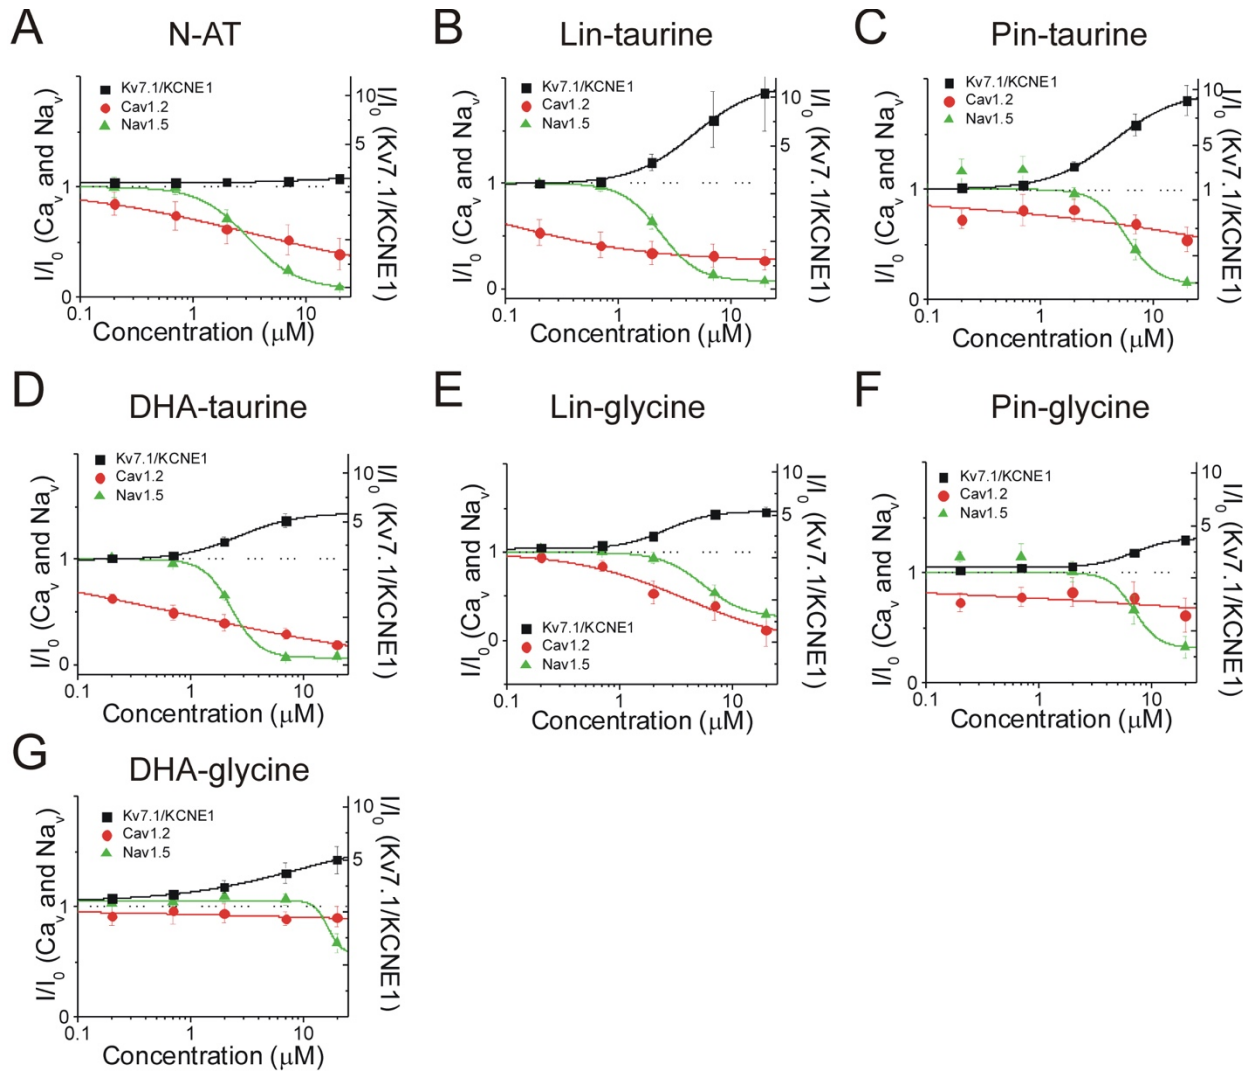

885

886 **Figure 11: Dose response curves for PUFAs on  $I_{Ks}$ ,  $I_{CaL}$ , and  $I_{NaV}$  at 0 mV.** Dose  
887 response of **A)** N-AT, **B)** lin-aurine, **C)** pin-aurine, **D)** DHA-aurine, **E)** lin-glycine, **F)**  
888 pin-glycine, and **G)** DHA-glycine on  $I_{Ks}$ ,  $I_{CaL}$ , and  $I_{NaV}$  currents ( $I/I_0$ ) at 0 mV.

889

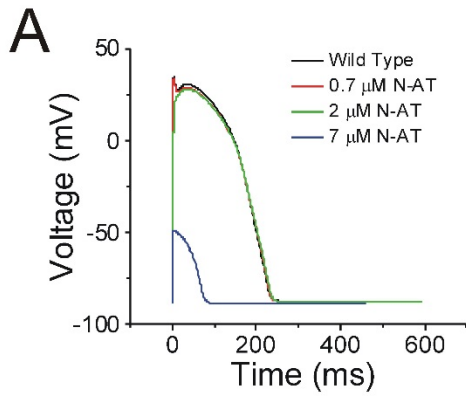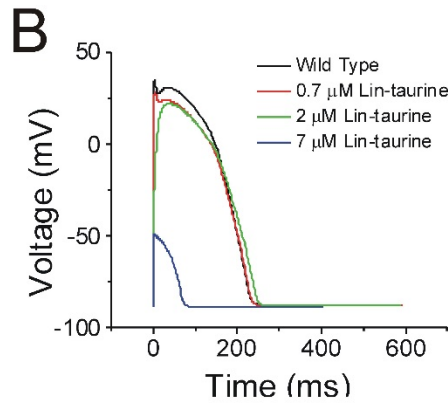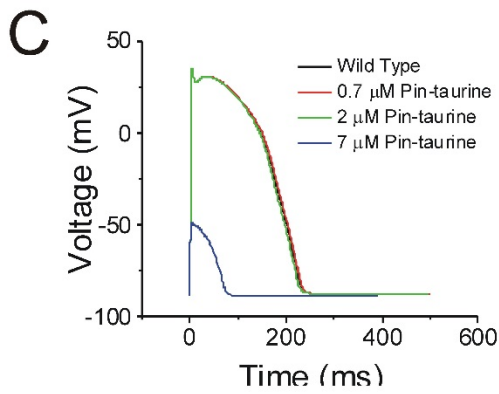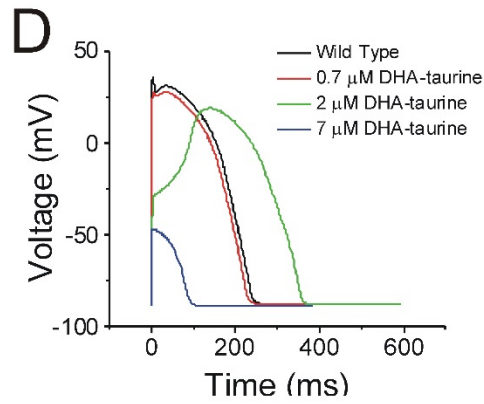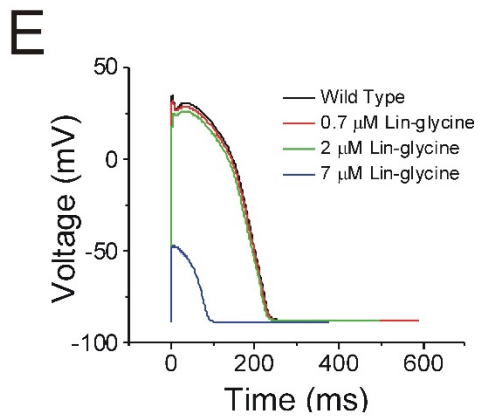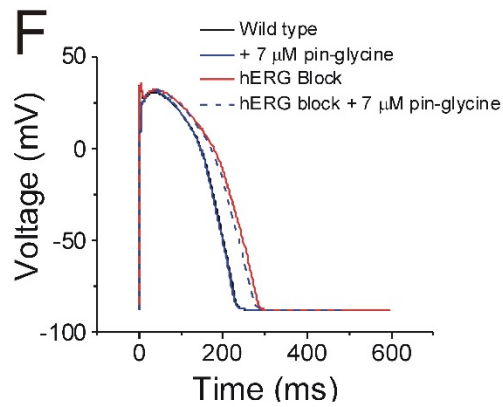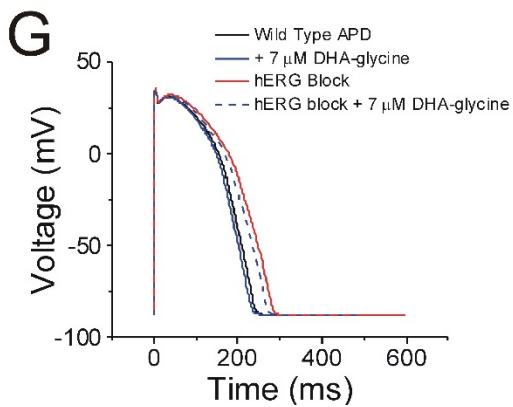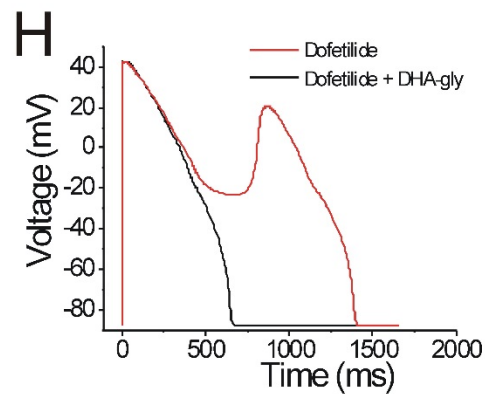



891 **Figure 12: PUFAs that are selective for Kv7.1/KCNE1 channels partially restore**  
892 **prolonged ventricular action potential and suppress early afterdepolarizations. A-**  
893 **G) Simulated ventricular action potential in wild type cardiomyocytes (black) and in the**  
894 **presence of A) 0.7 (red), 2 (green), and 7  $\mu$ M N-AT (blue), B) 0.7 (red), 2 (green), and 7**  
895  **$\mu$ M lin-aurine (blue), C) 0.7 (red), 2 (green), and 7  $\mu$ M pin-aurine (blue), D) 0.7 (red), 2**  
896 **(green), and 7  $\mu$ M DHA-aurine (blue), E) 0.7 (red), 2 (green), and 7  $\mu$ M lin-glycine**  
897 **(blue), F) 7  $\mu$ M pin-glycine (blue solid), following 25% hERG block (red) and in the**  
898 **presence of 7  $\mu$ M pin-glycine under 25% hERG block (blue dashed), and G) 7  $\mu$ M DHA-**  
899 **glycine (blue solid), following 25% hERG block (red) and in the presence of 7  $\mu$ M DHA-**  
900 **glycine under 25% hERG block (blue dashed). H) Early afterdepolarizations induced by**  
901 **dofetilide application (red) and suppression of early afterdepolarizations by 7  $\mu$ M DHA-**  
902 **glycine in the presence of dofetilide (black).**

903

## Cav1.2

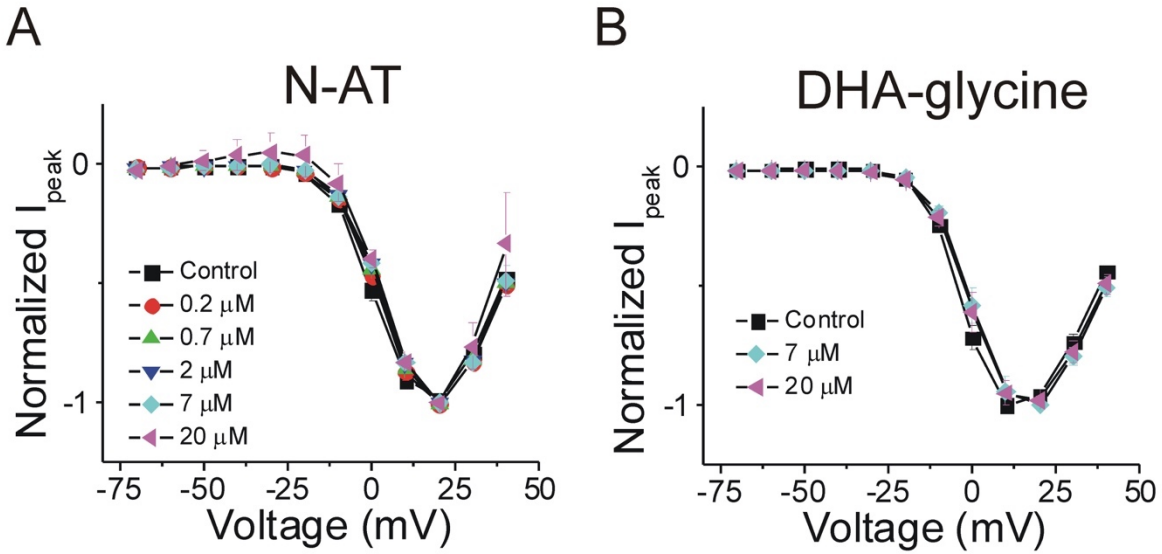

## Nav1.5

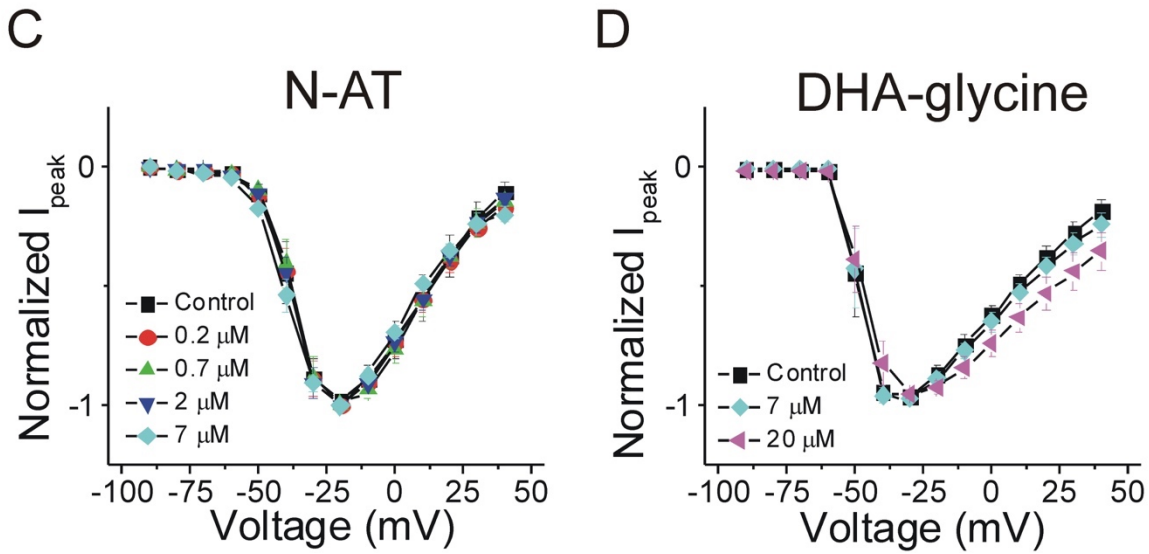

904

905 **Supplemental Figure 1: PUFA-induced changes in  $I/I_0$  normalized by**  
906 **concentration show no changes in voltage-dependent activation of Cav1.2 and**  
907 **Nav1.5 channels. A-B) Voltage-dependent activation of Cav1.2 in the presence of A)**  
908 **N-AT and B) DHA-glycine. Peak currents are normalized to each concentration to**  
909 **clearly visualize that there is no shifts in voltage-dependent activation. C-D) Voltage-**  
910 **dependent activation of Nav1.5 in the presence of C) N-AT and D) DHA-glycine. Peak**  
911 **currents are normalized to each concentration to clearly visualize that there are no shifts**  
912 **in voltage-dependent activation.**
